# Supplementary material for: Vitamin B1 diversity and characterization of biosynthesis genes in cassava
Source: PubMed Central journal article supplement (PMC5853225; doi:10.1093/jxb/erx196), 2017-06-21
Supplement: erx196_suppl_supplementary_figures_s1_s9_tables_s1_s7.pdf [file erx196_suppl_supplementary_figures_s1_s9_tables_s1_s7.pdf]

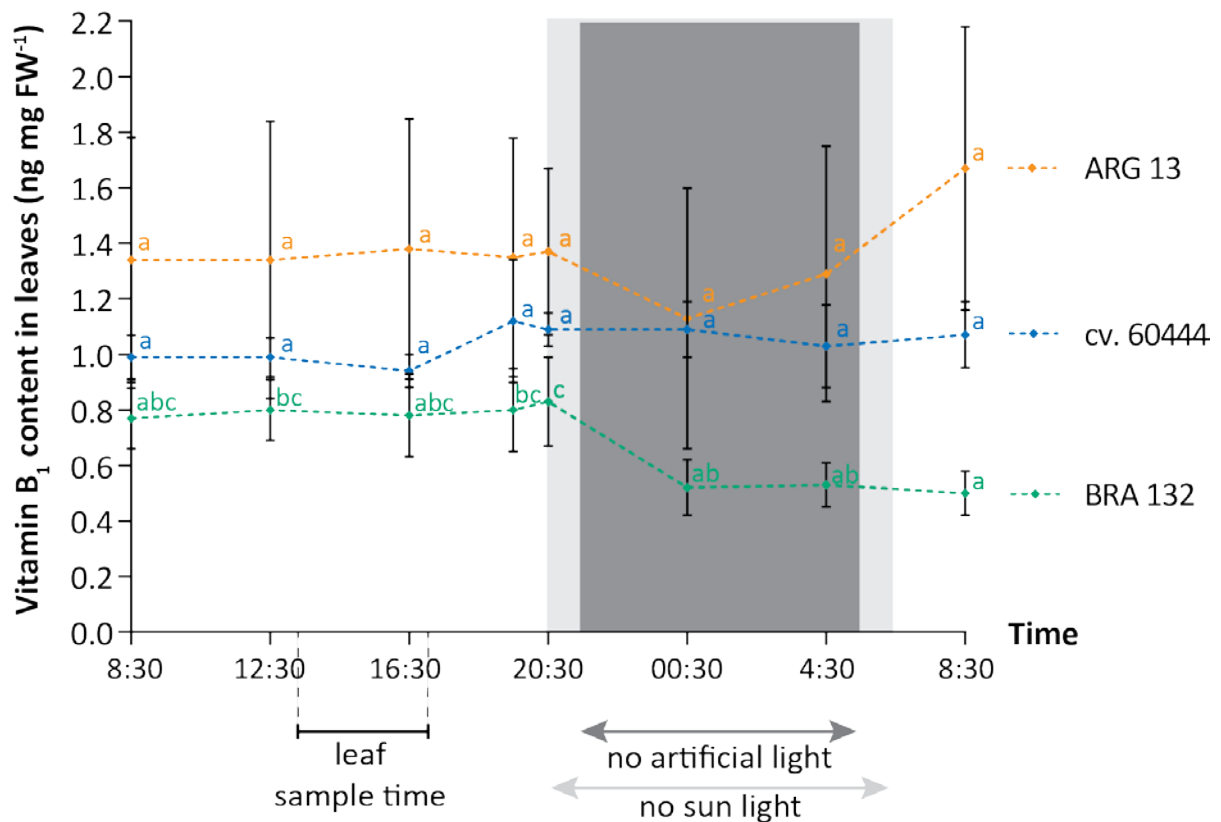

**Supplementary Fig. S1. Evaluation of vitamin B<sub>1</sub> content in leaves over a 24 h period.**

Leaf samples from 7-month-old greenhouse-grown cassava accessions (BRA 132, cv. 60444 and ARG 13) were collected every 4 h as well as 1 h before the end of the light periods (artificial and sunlight) and 1 h before the end of the dark period. Vitamin B<sub>1</sub> was measured using a yeast bioassay. Average  $\pm$  S.D. of 4 biological replicates. Tukey's multiple comparison test ( $p < 0.05$ ).

**A**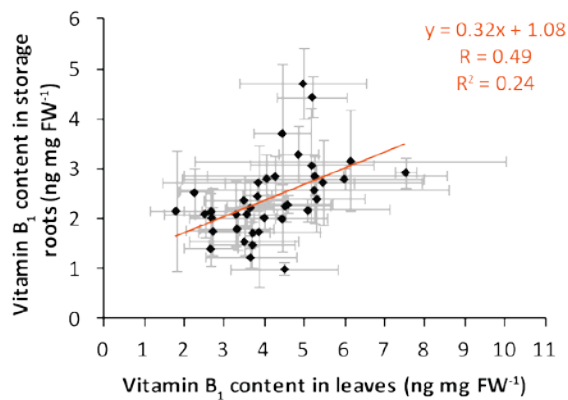**B**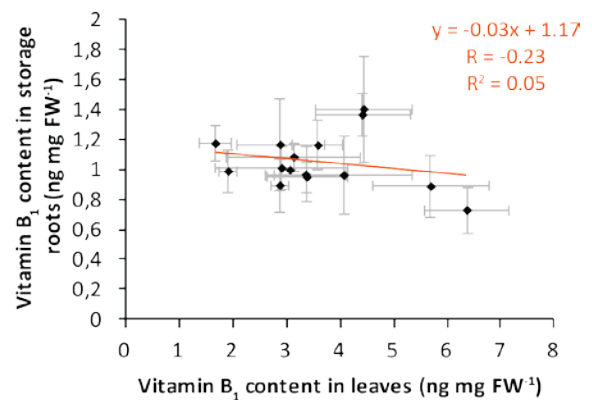

### Supplementary Fig. S2. Correlation between vitamin B<sub>1</sub> content in leaves and storage roots.

Vitamin B<sub>1</sub> content in storage roots plotted against vitamin B<sub>1</sub> content in leaves. Vitamin B<sub>1</sub> quantification was performed in 41 cassava accessions **(A)** and repeated in 18 selected accessions independently grown **(B)** using a yeast bioassay. **(A)** Average  $\pm$  S.D. of 3 biological replicates except TMS 30572 (n=2) for leaves and TMS 30572 (n=2), MEX 95 (n=2), PSE XXX-1 (n=2) for storage roots. T200 is not depicted, as it did not produce storage roots. **(B)** Average  $\pm$  S.D. of 4 biological replicates except CM2177-2 (n=1), TST-XXX-18 (n=3) for leaves and CM2177-2 (n=1), TST XXX-18 (n=1), MEX 95 (n=3) for storage roots.

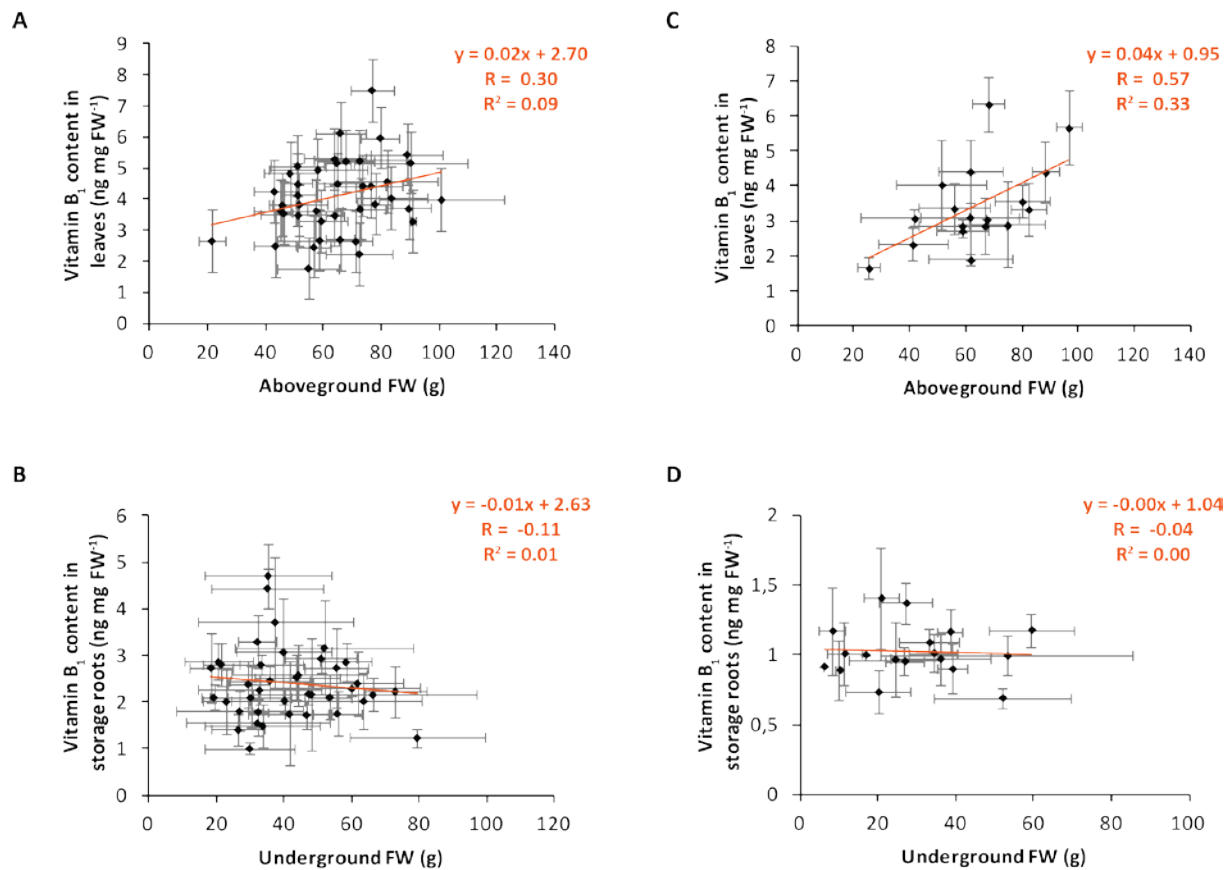

**Supplementary Fig. S3. Correlation between plant phenotype and vitamin B<sub>1</sub> content in leaves or storage roots.** Vitamin B<sub>1</sub> content in leaves plotted against plant above-ground fresh weight evaluated in 41 cassava accessions **(A)** and repeated in 18 selected accessions grown independently **(C)**. Vitamin B<sub>1</sub> content in storage roots plotted against plant underground fresh weight evaluated in 41 cassava accessions **(B)** and repeated in 18 selected accessions independently grown **(D)**. Vitamin B<sub>1</sub> content was quantified using a yeast bioassay. **(A)** Average  $\pm$  S.D. of 3 biological replicates except TMS 30572 (n=2). **(B)** Average  $\pm$  S.D. of 3 biological replicates except TMS 30572 (n=2), MEX 95 (n=2) and PSE XXX-1 (n=2). T200 is not depicted as it did not produce storage roots. **(C)** Average  $\pm$  S.D. of 4 biological replicates except CM2177-2 (n=1) and TST-XXX-18 (n=3). **(D)** Average  $\pm$  S.D. of 4 biological replicates except CM2177-2 (n=1), TST XXX-18 (n=1) and MEX 95 (n=3).

**A**

AM560-2\_Phytozome cv. 60444\_JGI TMe-3\_JGI TMe-7\_JGI SC8\_JGI COL 22\_JGI ATGGCCACCATGGCTACAGTCTCACATCTCTCTGCCAAACCCAGAAAGCTCTCTCTC ATGGCCACCATGGCTACAGTCTCACATCTCTCTGCCAAACCCAGAAAGCTCTCTCTC ATGGCCACCATGGCTACAGTCTCACATCTCTCTGCCAAACCCAGAAAGCTCTCTCTC ATGGCCACCATGGCTACAGTCTCACATCTCTCTGCCAAACCCAGAAAGCTCTCTCTC ATGGCCACCATGGCTACAGTCTCACATCTCTCTGCCAAACCCAGAAAGCTCTCTCTC \*\*\*\*\*

AM560-2\_Phytozome cv. 60444\_JGI TMe-3\_JGI TMe-7\_JGI SC8\_JGI COL 22\_JGI TTTGATTCCCTCCGCCTTCTGTGGCACTCCCTTGGCTGCACCTCCCTTCGCATGCAACCC TTTGATTCCCTCCGCCTTCTGTGGCACTCCCTTGGCTGCACCTCCCTTCGCATGCAACCC TTTGATTCCCTCCGCCTTCTGTGGCACTCCCTTGGCTGCACCTCCCTTCGCATGCAACCC TTTGATTCCCTCCGCCTTCTGTGGCACTCCCTTGGCTGCACCTCCCTTCGCATGCAACCC TTTGATTCCCTCCGCCTTCTGTGGCACTCCCTTGGCTGCACCTCCCTTCGCATGCAACCC \*\*\*\*\*

AM560-2\_Phytozome cv. 60444\_JGI TMe-3\_JGI TMe-7\_JGI SC8\_JGI COL 22\_JGI ACGAAAGCTAGTCTCTGGTGTATCTGTTTCTATGTCAGCATCTACTCCGCCGCTTATGAT ACGAAAGCTAGTCTCTGGTGTATCTGTTTCTATGTCAGCATCTACTCCGCCGCTTATGAT ACGAAAGCTAGTCTCTGGTGTATCTGTTTCTATGTCAGCATCTACTCCGCCGCTTATGAT ACGAAAGCTAGTCTCTGGTGTATCTGTTTCTATGTCAGCATCTACTCCGCCGCTTATGAT ACGAAAGCTAGTCTCTGGTGTATCTGTTTCTATGTCAGCATCTACTCCGCCGCTTATGAT ACGAAAGCTAGTCTCTGGTGTATCTGTTTCTATGTCAGCATCTACTCCGCCGCTTATGAT \*\*\*\*\*

AM560-2\_Phytozome cv. 60444\_JGI TMe-3\_JGI TMe-7\_JGI SC8\_JGI COL 22\_JGI CTGAGTGCTTTCAAGTTTAAACCCCATCAAGGAATCCATTGTGGCCCGTGAGATGACGCGC CTGAGTGCTTTCAAGTTTAAACCCCATCAAGGAATCCATTGTGGCCCGTGAGATGACGCGC CTGAGTGCTTTCAAGTTTAAACCCCATCAAGGAATCCATTGTGGCCCGTGAGATGACGCGC CTGAGTGCTTTCAAGTTTAAACCCCATCAAGGAATCCATTGTGGCCCGTGAGATGACGCGC CTGAGTGCTTTCAAGTTTAAACCCCATCAAGGAATCCATTGTGGCCCGTGAGATGACGCGC CTGAGTGCTTTCAAGTTTAAACCCCATCAAGGAATCCATTGTGGCCCGTGAGATGACGCGC \*\*\*\*\*

AM560-2\_Phytozome cv. 60444\_JGI TMe-3\_JGI TMe-7\_JGI SC8\_JGI COL 22\_JGI AGGTACATGACGGACATGGTTACGCATGCAGATACTGATGTGGTGTATGTGGGTGCTGGC AGGTACATGACGGACATGGTTACGCATGCAGATACTGATGTGGTGTATGTGGGTGCTGGC AGGTACATGACGGACATGGTTACGCATGCAGATACTGATGTGGTGTATGTGGGTGCTGGC AGGTACATGACGGACATGGTTACGCATGCAGATACTGATGTGGTGTATGTGGGTGCTGGC AGGTACATGACGGACATGGTTACGCATGCAGATACTGATGTGGTGTATGTGGGTGCTGGC AGGTACATGACGGACATGGTTACGCATGCAGATACTGATGTGGTGTATGTGGGTGCTGGC \*\*\*\*\*

AM560-2\_Phytozome cv. 60444\_JGI TMe-3\_JGI TMe-7\_JGI SC8\_JGI COL 22\_JGI TCTGTGGCCTCTCTTGTGCTTATGAGCTTAGCAAGAACCCTCTGTGAAGGTTGCCATT TCTGTGGCCTCTCTTGTGCTTATGAGCTTAGCAAGAACCCTCTGTGAAGGTTGCCATT TCTGTGGCCTCTCTTGTGCTTATGAGCTTAGCAAGAACCCTCTGTGAAGGTTGCCATT TCTGTGGCCTCTCTTGTGCTTATGAGCTTAGCAAGAACCCTCTGTGAAGGTTGCCATT TCTGTGGCCTCTCTTGTGCTTATGAGCTTAGCAAGAACCCTCTGTGAAGGTTGCCATT TCTGTGGCCTCTCTTGTGCTTATGAGCTTAGCAAGAACCCTCTGT----- \*\*\*\*\*

AM560-2\_Phytozome cv. 60444\_JGI TMe-3\_JGI TMe-7\_JGI SC8\_JGI COL 22\_JGI GTTGAGCAATCTGTTAGCCCTGGTGGTGGTCTTGGCTCGGTGGCCAGCTCTTCTCTGCC GTTGAGCAATCTGTTAGCCCTGGTGGTGGTCTTGGCTCGGTGGCCAGCTCTTCTCTGCC GTTGAGCAATCTGTTAGCCCTGGTGGTGGTCTTGGCTCGGTGGCCAGCTCTTCTCTGCC GTTGAGCAATCTGTTAGCCCTGGTGGTGGTCTTGGCTCGGTGGCCAGCTCTTCTCTGCC GTTGAGCAATCTGTTAGCCCTGGTGGTGGTCTTGGCTCGGTGGCCAGCTCTTCTCTGCC ----- \*\*\*\*\*

AM560-2\_Phytozome cv. 60444\_JGI TMe-3\_JGI TMe-7\_JGI SC8\_JGI COL 22\_JGI ATG----- ATGTAATCAAAATCCCTTTTTCAGAGCAGAATCTAAATATTTGTTTCTTTAAACTGA ATGTAATCAAAATCCCTTTTTCAGAGCAGAATCTAAATATTTGTTTCTTTAAACTGA ATGTAATCAAAATCCCTTTTTCAGAGCAGAATCTAAATATTTGTTTCTTTAAACTGA ATGTAATCAAAATCCCTTTTTCAGAGCAGAATCTAAATATTTGTTTCTTTAAACTGA ----- \*\*\*\*\*

AM560-2\_Phytozome cv. 60444\_JGI TMe-3\_JGI TMe-7\_JGI SC8\_JGI COL 22\_JGI -----GTGGTTCGCAAACCTGCTCAACTCTTCTTGA TCTTTTCGTATATATGTTTGTGGTCAGGTGGTTCGCAAACCTGCTCAACTCTTCTTGA TCTTTTCGTATATATGTTTGTGGTCAGGTGGTTCGCAAACCTGCTCAACTCTTCTTGA TCTTTTCGTATATATGTTTGTGGTCAGGTGGTTCGCAAACCTGCTCAACTCTTCTTGA TCTTTTCGTATATATGTTTGTGGTCAGGTGGTTCGCAAACCTGCTCAACTCTTCTTGA ----- \*\*\*\*\*

AM560-2\_Phytozome cv. 60444\_JGI TMe-3\_JGI TMe-7\_JGI SC8\_JGI TGAGCTAGGCATCGAGTACGATGAAGCAGACAACCTATGTAGTAATCAAGCATGCTGCCCT TGAGCTAGGCATCGAGTACGATGAAGCAGACAACCTATGTAGTAATCAAGCATGCTGCCCT TGAGCTAGGCATCGAGTACGATGAAGCAGACAACCTATGTAGTAATCAAGCATGCTGCCCT TGAGCTAGGCATCGAGTACGATGAAGCAGACAACCTATGTAGTAATCAAGCATGCTGCCCT TGAGCTAGGCATCGAGTACGATGAAGCAGACAACCTATGTAGTAATCAAGCATGCTGCCCT

```

COL 22_JGI -----
*****

AM560-2_Phytozome GTTCACATCCACAATTATGAGCAAACCTCCTAGCCC GCCCAATGTTAAGCTTTTCAACGC
cv. 60444_JGI GTTCACATCCACAATTATGAGCAAACCTCCTAGCCC GCCCAATGTTAAGCTTTTCAACGC
TMe-3_JGI GTTCACATCCACAATTATGAGCAAACCTCCTAGCCC GCCCAATGTTAAGCTTTTCAACGC
TMe-7_JGI GTTCACATCCACAATTATGAGCAAACCTCCTAGCCC GCCCAATGTTAAGCTTTTCAACGC
SC8_JGI GTTCACATCCACAATTATGAGCAAACCTCCTAGCCC GCCCAATGTTAAGCTTTTCAACGC
COL 22_JGI -----
*****

AM560-2_Phytozome AGTGGCTGCCGAGGACCTGATAGTGAAGAATGGAAGAGTGGGTGGCGTGGTCACCAACTG
cv. 60444_JGI AGTGGCTGCCGAGGACCTGATAGTGAAGAATGGAAGAGTGGGTGGCGTGGTCACCAACTG
TMe-3_JGI AGTGGCTGCCGAGGACCTGATAGTGAAGAATGGAAGAGTGGGTGGCGTGGTCACCAACTG
TMe-7_JGI AGTGGCTGCCGAGGACCTGATAGTGAAGAATGGAAGAGTGGGTGGCGTGGTCACCAACTG
SC8_JGI AGTGGCTGCCGAGGACCTGATAGTGAAGAATGGAAGAGTGGGTGGCGTGGTCACCAACTG
COL 22_JGI -----
*****

AM560-2_Phytozome GGCTCTTGTGTCAATGAACCACGACACACAGTCTTGCATGGACCCCAATGTAATGGAGGC
cv. 60444_JGI GGCTCTTGTGTCAATGAACCACGACACACAGTCTTGCATGGACCCCAATGTAATGGAGGC
TMe-3_JGI GGCTCTTGTGTCAATGAACCACGACACACAGTCTTGCATGGACCCCAATGTAATGGAGGC
TMe-7_JGI GGCTCTTGTGTCAATGAACCACGACACACAGTCTTGCATGGACCCCAATGTAATGGAGGC
SC8_JGI GGCTCTTGTGTCAATGAACCACGACACACAGTCTTGCATGGACCCCAATGTAATGGAGGC
COL 22_JGI -----
*****

AM560-2_Phytozome CAAAGTAGTCGTAAGCTCTTGTGGCCATGATGGACCCTTTGGTGCCACTGGAGTCAAAG
cv. 60444_JGI CAAAGTAGTCGTAAGCTCTTGTGGCCATGATGGACCCTTTGGTGCCACTGGAGTCAAAG
TMe-3_JGI CAAAGTAGTCGTAAGCTCTTGTGGCCATGATGGACCCTTTGGTGCCACTGGAGTCAAAG
TMe-7_JGI CAAAGTAGTCGTAAGCTCTTGTGGCCATGATGGACCCTTTGGTGCCACTGGAGTCAAAG
SC8_JGI CAAAGTAGTCGTAAGCTCTTGTGGCCATGATGGACCCTTTGGTGCCACTGGAGTCAAAG
COL 22_JGI -----TCTTGTGGCCATGATGGACCCTTTGGTGCCACTGGAGTCAAAG
*****

AM560-2_Phytozome GCTGAAGAGCATTGGCATGATTGAGAATGTCCAGGGATGAAAGCTCTGGACATGAACAC
cv. 60444_JGI GCTGAAGAGCATTGGCATGATTGAGAATGTCCAGGGATGAAAGCTCTGGACATGAACAC
TMe-3_JGI GCTGAAGAGCATTGGCATGATTGAGAATGTCCAGGGATGAAAGCTCTGGACATGAACAC
TMe-7_JGI GCTGAAGAGCATTGGCATGATTGAGAATGTCCAGGGATGAAAGCTCTGGACATGAACAC
SC8_JGI GCTGAAGAGCATTGGCATGATTGAGAATGTCCAGGGATGAAAGCTCTGGACATGAACAC
COL 22_JGI GCTGAAGAGCATTGGCATGATTGAGAATGTCCAGGGATGAAAGCTCTGGACATGAACAC
***.*****

AM560-2_Phytozome TGCTGAAGATGCCATTGTTAGGCTTACCAGAGAGATTGTGCCAGGAATGATTGTCACGGG
cv. 60444_JGI TGCTGAAGATGCCATTGTTAGGCTTACCAGAGAGATTGTGCCAGGAATGATTGTCACGGG
TMe-3_JGI TGCTGAAGATGCCATTGTTAGGCTTACCAGAGAGATTGTGCCAGGAATGATTGTCACGGG
TMe-7_JGI TGCTGAAGATGCCATTGTTAGGCTTACCAGAGAGATTGTGCCAGGAATGATTGTCACGGG
SC8_JGI TGCTGAAGATGCCATTGTTAGGCTTACCAGAGAGATTGTGCCAGGAATGATTGTCACGGG
COL 22_JGI CGCTGAAGATGCCATTGTTAGGCTTACCAGAGAGATTGTGCCAGGAATGATTGTCACGGG
.*****.

AM560-2_Phytozome CATGGAAGTTGCAGAGATTGATGGCGCTCCAAGAATGGTAGACTTCAATTTCCCTCTTTG
cv. 60444_JGI CATGGAAGTTGCAGAGATTGATGGCGCTCCAAGAATGGTAGACTTCAATTTCCCTCTTTG
TMe-3_JGI CATGGAAGTTGCAGAGATTGATGGCGCTCCAAGAATGGTAGACTTCAATTTCCCTCTTTG
TMe-7_JGI CATGGAAGTTGCAGAGATTGATGGCGCTCCAAGAATGGTAGACTTCAATTTCCCTCTTTG
SC8_JGI CATGGAAGTTGCAGAGATTGATGGCGCTCCAAGAATGGTAGACTTCAATTTCCCTCTTTG
COL 22_JGI CATGGAAGTTGCAGAGATTGATGGCGCTCCAAGAATGGTAGACTTCAATTTCCCTCTTTG
*****

AM560-2_Phytozome A-----
cv. 60444_JGI ATGATTAAATTGAACAACCTCTAGTGTTTGTAACTGATGAATCCATGCGTGTACTCTGTTG
TMe-3_JGI ATGATTAAATTGAACAACCTCTAGTGTTTGTAACTGATGAATCCATGCGTGTACTCTGTTG
TMe-7_JGI ATGATTAAATTGAACAACCTCTAGTGTTTGTAACTGATGAATCCATGCGTGTACTCTGTTG
SC8_JGI ATGATTAAATTGAACAACCTCTAGTGTTTGTAACTGATGAATCCATGCGTGTACTCTGTTG
COL 22_JGI ATGATTAAATTGAACAACCTCTAGTGTTTGTAACTGATGAATCCATGCGTGTACTCTGTTG
*****

AM560-2_Phytozome --- -----
cv. 60444_JGI CAGGGACCAACATTTGGAGCCATGATGATATCAGGGCAGAAGGCGGCTCATCTTGCCTTG
TMe-3_JGI CAGGGACCAACATTTGGAGCCATGATGATATCAGGGCAGAAGGCGGCTCATCTTGCCTTG
TMe-7_JGI CAGGGACCAACATTTGGAGCCATGATGATATCAGGGCAGAAGGCGGCTCATCTTGCCTTG
SC8_JGI CAGGGACCAACATTTGGAGCCATGATGATATCAGGGCAGAAGGCGGCTCATCTTGCCTTG
COL 22_JGI CAGGGACCAACATTTGGAGCCATGATGATATCAGGGCAGAAGGCGGCTCATCTTGCCTTG
*****

```

```

AM560-2_Phytozome -----
cv. 60444_JGI      AAGACGCTGGGGCTGCCTAATGCCTTGGATGGAACATACAAGCGAAGCCCAGAATTTGTC
TMe-3_JGI          AAGACGCTGGGGCTGCCTAATGCCTTGGATGGAACATACAAGCGAAGCCCAGAATTTGTC
TMe-7_JGI          AAGACGCTGGGGCTGCCTAATGCCTTGGATGGAACATACAAGCGAAGCCCAGAATTTGTC
SC8_JGI            AAGACGCTGGGGCTGCCTAATGCCTTGGATGGAACATACAAGCGAAGCCCAGAATTTGTC
COL 22_JGI         AAGACGCTGGGGCTGCCTAATGCCTTGGATGGAACATACAAGCGAAGCCCAGAATTTGTC
*****

AM560-2_Phytozome -----
cv. 60444_JGI      CTAGCAGCAGCAGACTCTGCAGAGACTGCAGATGCTTGA
TMe-3_JGI          CTAGCAGCAGCAGACTCTGCAGAGACTGCAGATGCTTGA
TMe-7_JGI          CTAGCAGCAGCAGACTCTGCAGAGACTGCAGATGCTTGA
SC8_JGI            CTAGCAGCAGCAGACTCTGCAGAGACTGCAGATGCTTGA
COL 22_JGI         CTAGCAGCAGCAGACTCTGCAGAGACTGCAGATGCTTGA
*****

```

**B**

```

AtTHI1      MAIASTLSLSSTKPQ--RLFDS-SFHGSAISAAPISIGLKP---RS-FSVRATTAGYD
MeTHI1a     MATMATALTSLSAKPQNHS LFDSSAFYGTGTPVAAPSVRMQPTKSTTAVSISMSASTPPPYN
MeTHI1b     MATMATALTSLSAKPQKLSLFDSSAFCGTPLAAPSLRMQPTKASSGVSVSMSASTPPPYD
*:*:*:*:*: *:***  *** :* *: :*: : : . * :* *:

AtTHI1      LNAFTFDPIKESIVSREMTRRYMTDMITYAETD VVVVGA G SAGLSAAAYEISKPNPNVQVAI
MeTHI1a     LSAFKFHPIKESIVAREMTRRYMTDMVTHADTD VVIVGA G SAGLS CAYELSKNPSVKVAI
MeTHI1b     LSAFKFNP IKESIVAREMTRRYMTDMVTHADTD VVIVGA G SAGLS CAYELSKNPSVKVAI
* . * . * . ***** :***** :* :* :***** :***** . *** :*** . * :***

AtTHI1      IEQSVSPGGGAWLGGQLFSAMIVRKPAHLFLDELIGVAYDEQDQTYVVVKHAALFTSTIMSK
MeTHI1a     VEQSVSPGGGAWLGGQLFSAMVVRKPAHLFLDELGIDYDEADNYVVIKHAALFTSTIMSK
MeTHI1b     VEQSVSPGGGAWLGGQLFSAMVVRKPAQLFLDELGIEYDEADNYVVIKHAALFTSTIMSK
:***** :***** :***** :* :* * . * . * :*****

AtTHI1      LLARPVNKLFNAVAEEDLIVKNGRVGGVVTNWALVAQNHTQSCMDPNVMEAKIVVSSCG
MeTHI1a     LLARPVNKLFNAVAEEDLIVKNGRVGGVVTNWALVSMNHDTQSCMDPNVMEAKVVVSSCG
MeTHI1b     LLARPVNKLFNAVAEEDLIVKNGRVGGVVTNWALVSMNHDTQSCMDPNVMEAKVVVSSCG
***** :***** :* . ***** :*****

AtTHI1      HDGPFGATGVKRLKLSIGMIDHVPGMKALDMNTAEDAIVRLTREVVPGMIVTGMVEVAEIDG
MeTHI1a     HDGPFGATGVKRLKLSIGMIENVPGMKALDMNTAEDAIVRLTREIVPGMIVTGMVEVAEIDG
MeTHI1b     HDGPFGATGVKRLKLSIGMIENVPGMKALDMNTAEDAIVRLTREVVPGMIVTGMVEVAEIDG
***** :***** :***** :*****

AtTHI1      APRMGPTFGAMMISGQKAGQLALKALGLPNAIDGTLVGNLSPELVLAADS AETVDA
MeTHI1a     APRMGPTFGAMMISGQKAAHLALKTLGLPNALEGTFT--LRPEFVIAADS AETAEA
MeTHI1b     APRMGPTFGAMMISGQKAAHLALKTLGLPNALDGTYK--RSPEFVLAADS AETADA
***** :***** :***** :* * :* :***** :*

```

**Supplementary Fig. S4. Determination of the *MeTHI1b* full coding sequence and alignment of AtTHI1, MeTHI1a, MeTHI1b protein sequences.**

**(A)** Determination of the *MeTHI1b* full coding sequence. In the *Manihot esculenta* v6.1 genome available in Phytozome (Prochnik *et al.*, 2012), the *MeTHI1b* coding sequence appears incomplete. To determine the unknown sequence, JGI Illumina sequencing data from gDNA for cassava accessions cv. 60444, TMe-3, TMe-7, SC8 and COL 22 (Bredeson *et al.*, 2016) was assembled into contigs (JGI, personal communication). Consensus sequences were extracted and the *MeTHI1b* truncated coding sequence was used for BLAST searches to identify *MeTHI1b* sequences in each variety. Complete hits with additional 5' and 3' nucleotides were obtained for all varieties, except COL 22 where the internal 449 bp was not contained within assembled contigs. Splice sites were predicted, using the NetPlantGene server (Hebsgaard *et al.*, 1996). An intron was predicted at the 3' end of the truncated *MeTHI1b* gene available in Phytozome, which was not predicted in the annotation. Predicted introns are highlighted in gray. Stars indicate sequence homology between all available sequences. Sequence differences between cultivars are in vermilion. **(B)** Alignment of AtTHI1 (encoded by At5g54770), MeTHI1a (encoded by Manes.15G075600, 78% identity with AtTHI1) and MeTHI1b (encoded by Manes.03G123800, 79% identity with AtTHI1) protein sequences. In gray are highlighted the invariant residues previously hypothesized to play an essential role in the enzymatic activity of THI1 (Godoi *et al.*, 2006). The AtTHI1 protein sequence is from the TAIR10 database (Lamesch *et al.*, 2012), the MeTHI1a protein sequence is from Phytozome (Prochnik *et al.*, 2012) and the MeTHI1b predicted protein sequence were used for the alignment. The translation of the *MeTHI1b* coding sequence predicted from the JGI data **(A)** resulted in a full length protein of high sequence similarity to AtTHI1 **(B)**.

A

**MeTHIC1 (form Ia) – 1308 bp** [F<sub>THIC1</sub> – R<sub>THIC1</sub>]

CCGGAAAGTTACATTAGATCTTCTGAAAGGTGAGGATCAAGTTCACTTAAACCTATAAAGGACTTGTACTAATGGTGGAAAGTTTTAGA  
ATTGCAATCTGTGGATACGATCTGTAGTGGAAAGTACATAATACATTATTTCTAATTGCAACTCCTAAATGCCTAATTTGCCACTTCAACA  
TCTATCTAGCAAGATTTAGTGTAAACACGGACCAACCGGAGGGAATATAATTTTCTCAGGCGGTTGCTGGCAAGGAATGTTGTCATATG  
GGAACGTTGTTATCATATGATCACAGTGCCTCTATGTCTCTAAAAGATTGTCAACGCAGAAAACGTAGAGTCTTAACTTATTTTGA  
AAATTTTGAATTATTGATGTTAGTCTTTGTTATGCTAATGCTTGACCACCAAGTACCCTATTGGATTGTGGTTCGCTTACTGCCTGATAT  
CATATTTATTTTAAACCAGATGGACTGTCATCGCTAAAACTGTAATGAAACGCTTATTGAATTTCTTGCAAGGAGCATATGAGTGCC  
AGGGATTTGGTCAAAAAAGCGTTGGAACATTATGCATGGTTAGGTTGTGACAATAAGGGATATGCCATTTTCTTCTGATAGAGGTAA  
GTTGATGGGTTAGTGTGTTAGGACTGGGAGACATTTTATCTTTGTTACATCTTGTGTGCGCCGTAATANANAGGGCAATATTACAATT  
GCTACATTCTCTTATGGCAAGTCTTTTTATCTGTTGGTTATGTTAACGAAAGAAACGCACAGGGTGCCTGTTTTCTGCTTAAATA  
CTGGCCATTTGGTTCATCTTGTAGCAGGTCAGGCTGAGAAAGTNCCTTTGAACCTGAACAGGATAATACCTGCGTAGGGAGTGTGCATTTTC  
TTTTCCCTTTTTGTTCTTGCACAGGGAGGCAGCTTCTATGCTCGGGCAAGTTGATACACATTGTGCAGATTACCAAGAATCTGGGAT  
TATTGCTTCACTGGCTGCAACGTAATCATGGCTGGCAATTCATGCAATTCTGGATCAATATTTAAAAAGGGAAGAGAAAATTCGTCAA  
ATATTACCATCTATTTATTTTGTTAATACATGGTAAGATGATTGAGAATAATTTAAAAATGTCAATTACACAAAATGCGTAGTATATCTG  
ATAACAAATAGAAGTACTATCAAAGACATTAATGATTATAACTTCAGACCCAGCACCCCTCTCTGTAAAGGGAACAAATTGACGTTA  
AAAATCTCTTAATGGCCTAAAAGTTAATCCTTTTAAATTGCTTGC

**MeTHIC1 (form Ib) – 815 bp** [F<sub>THIC1</sub> – R<sub>THIC1</sub>]

CCGGAAAGTTACATTAGATCTTCTGAAAGGAGCATATGAGTGCCAGGGATTGGTCAAAAAAGCGTTGGAACATTATGCATGGTTAGG  
TTGTGACAATAAGGGATATGCCATTTTCTNTCTGATAGAGGTAAAGTTGATGGGTTAGTGTGTTAGGACTGGGAGACATTTTATCTTTG  
TTCACATCTTGTGTGCGCCGTAATAAAAAGGGCAATATTACAATTGCTACATTCTTTATGGGCAAGTCTTTTTATCTGTTGGTTAT  
GTTAACGAAAGAAACGCACAGGGTGCCTGTTTTCTGCTTAAACTGGCCATTTGGTTCATCTTGTAGCAGGTCAGGCTGAGAAAGTCC  
TTTGAACCTGAACAGGATAATACCTGCGTAGGGAGTGTGCATTTTCTTTCCCTTTTTGTTCTTGCACAGGGAGGCAGCTTCTATGCTC  
GGGCAAGTTGATACACATTGTGCAGATTACCAAGAATCTGGGATTATTGCTTCAGTGGCTGCAACGTAATCATGGCTGGCAATTCATG  
CAATCTTGGATCAATATTTAAAAAGGGAAGAGAAAATTCGTCAAATATTACCATCTATTTATTTTGTTAATACATGGTAAGATGATT  
CAGAATAATTTAAAAATGTCAATTACACAAAATGCGTAGTATATCTGATAACAAATAGAAGTACTATCAAAGACATTAATGATTATAACTT  
CAGACCCAGCACCCCTCTCTGTAAAGGGAACAAATTGACGTTAAAAATCCTCTTAATGGCCTAAAAGTTAATCCTTTTAAATTGCTTGC

**MeTHIC1 (form III) – 652 bp** [F<sub>THIC1</sub> – R<sub>THIC1</sub>]

CCGGAAAGTTACATTAGATCTTCTGAAAGGAGCATATGAGTGCCAGGGATTGGTCAAAAAAGCGTTGGAACATTATGCATGGTTAGG  
TTGTGACAATAAGGGATATGCCATTTTCTTTCTGATAGAGGGGTGCCTGTTTTCTGCTTAAACTGGCCATTTGGTTCATCTTGTAGCAGG  
TCAGGCTGAGAAAGTCCCTTTGAACCTGAACAGGATAATACCTGCGTAGGGAGTGTGCATTTTCTTTCCCTTTTTGTTCTTGCACAGGG  
AGGCAGCTTCTATGCTCGGGCAAGTTGATACACATTGTGCAGATTACCAAGAATCTGGGATTATTGCTTCAGTGGCTGCAACGTAAT  
CATGGCTGGCAATTCATGCAATTCTTGGATCAATATTTAAAAAGGGAAGAGAAAATTCGTCAAATATTACCATCTATTTATTTTGTTTA  
ATACATGGTAAGATGATTGAGAATAATTTAAAAATGTCAATTACACAAAATGCGTAGTATATCTGATAACAAATAGAAGTACTATCAAAG  
ACATTAATGATTATAACTTCAGACCCAGCACCCCTCTCTGTAAAGGGAACAAATTGACGTTAAAAATCCTCTTAATGGCCTAAAAGTTA  
ATCCTTTTAAATTGCTTGC

**MeTHIC1 (form III) – 517 bp** [F<sub>THIC1</sub> – 3'-RACE nested]

CCGGAAAGTTACATTAGATCTTCTGAAAGGAGCATATGNNNGCCAGGGATTGGTCAAAAAAGCGTTGGAACATTATGCATGGTTAGG  
TTGTGACAATAAGGGATATGCCATTTTCTTTCTGATAGAGGGGTGCCTGTTTTCTGCTTAAACTGGCCATTTGGTTCATCTTGTAGCAGG  
TCAGGCTGAGAAAGTCCCTTTGAACCTGAACAGGATAATACCTGCGTAGGGAGTGTGCATTTTCTTTCCCTTTTTGTTCTTGCACAGGG  
AGGCAGCTTCTATGCTCGGGCAAGTTGATACACATTGTGCAGATTACCAAGAATCTGGGATTATTGCTTCAGTGGCTGCAACGTAAT  
CATGGCTGGCAATTCATGCAATTCTTGGATCAATATTTAAAAAGGGAAGAGAAAATTCGTCAAATATTACCATCTATTTATTTTGTTTA  
ATACATGGTAAGATGATTGAGAATAATTTAAAAATGTCAATTACACAAAAA

**MeTHIC1 (form II) – 275 bp** [F<sub>THIC1</sub> – 3'-RACE nested]

CCGGAAAGTTACATTAGATCTTCTGAAAGGAGCATATGAGTGCCAGGGATTGGTCAAAAAAGCGTTGGAACATTATGCATGGTTAGG  
TTGTGACAATAAGGGATATGCCATTTTCTTTCTGATAGAGGTAAAGTTGATGGGTTAGTGTGTTAGGACTGGGAGACATTTTATCTTTGT  
TCACATCTTGTGTGCGCCGTAATAAAAAGGGCAATATTACAATTGCTACATTCTTTATGGGCAAGTCTTTTTTAAAAA  
AAAA

**MeTHIC1 (form II) – 250 bp** [F<sub>THIC1</sub> – 3'-RACE nested]

CCGGAAAGTTACATTAGATCTTCTGAAAGGAGCATATGAGTGCCAGGGATTTGGTCAAAAAGCGTTGGAAC TATTATGCATGGTTAGG  
TTGTGACAATAAGGGATATGCCATTTTCTTTCTGATAGAGGTAAGTTGATGGGTTTAGTGTGTTAGGACTGGGAGACATTTTATCTTTGT  
TCACATCTTGTGTGTCGCCGTAATAAAAAGGGCAATATTACAATTGCTACATTAAAAAAAAAAAAAAAAAAAAA

**B**

**MeTHIC2 (form Ia) – 1081 bp** [F<sub>THIC2</sub> – R<sub>THIC2</sub>]

GCCAGCAAGTTATATTAATCCTCTAAGAGGTAAGGATCAAATTCAAATAANCTAAAAAGGTCCTTCTACTTTGGTGGAAAATCTAGAA  
TTGCATTAAGTAAATAATNCATTAATCATTGCAATTGCAAGTACACTGCTTACTTAACCACTTTACCATCTGACTAGCAAGATTAAGCA  
AAGGGTCCTGTTCTTGTATCGTAAAGTCTCCAGGCCAACTTATTATGGAAGATTGTTGATATTAGTTTCTGTTATGCTACTGTTTG  
AACCATGAAAGTAACTTGAGATCATGGTTACATTATGCTTGATATCTCATTGTGTNTNTTATTGGTTGGACTATGACTTTCCTCACT  
TGGAACTTGAATGTTNTTGGAAATTTCTTGACAGGAGCATGTGAGGGGGAAGATTGGTTAAGTCATCATTGGAAGTGTGATGCATGT  
CTGAGTTGTGAGGATGATGGATATGCTGATTTGCTTCCAGATGCAGGTAAGTTGATGATTTAGCGTGTAGGACCTGGAGACATTATCT  
TAGTTTGATTGATGTTTCTGCTAATAAGAAGCGATAATACAGTTGCTACATCTCTTTATGTTCAAGTTATTTCTCTCTTTTTTTTTCTT  
TTGTGTGTGTATTATCATTGGATGTTGTCTTGACGAAAGAAACGCACAGGGGTGCCTGTATCTGCTTTAATACTGGCCATTTTGGC  
CAGAGGATAGAGCTGGTCAAGGCTGAGAAAGTCCCTTTGAACCTGAACAGGATAATGCCTGCGTAGGGAGTGTGCATTTTCTTTCCCTTT  
TTCTGTTCTTGACAGGGAGGCAGCTTCTATGGCTCGGGCTAGCTGATCCATATGTGCAGAATCAATCGCCATTGAGCCAGGATTATC  
ACTTGAGCGGCTGCAACGTCATCATGGCTGGCAGTTTATGCAATCTTCAACCAATATTTAAATAGTAAAGAGAAAATTTGACAAGGCT  
TGCTTGATCAGCCATTTATTGGATTTTGGTCAATCTATGGTACGAACNNTAAAATAATAAAAAATTTCGTATATCCGATATAACAAGTG

**MeTHIC2 (form Ib) – 717 bp** [F<sub>THIC2</sub> – R<sub>THIC2</sub>]

GCCAGCAAGTTATATTAATCCTCTAAGAGGAGCATGTGAGGGGGAAGATTGGTTAAGTCATCATTGGAAGTGTGATGCATGTCTGAG  
TTGTGAGGATGATGGATATGCTGATTTGCTTCCAGATGCAGGTAAGTTGATGATTTAGCGTGTAGGACCTGGAGACATTATCTTAGTT  
TGATTCATGTTTCTGCTAATAAGAAGCGATAATACAGTTGCTACATCTCTTTATGTTCAAGTTATTTCTCTCTTTTTTTTTCTTTTGTG  
TGTGTGATTTATCATTGGATGTTGTCTTGACGAAAGAAACGCACAGGGGTGCCTGTATCTGCTTTAATACTGGCCATTTTGGCCAGAG  
GATAGAGCTGGTCAAGGCTGAGAAAGTCCCTTTGAACCTGAACAGGATAATGCCTGCGTAGGGAGTGTGCATTTTCTTTCCCTTTTTCTGT  
TCTTGACAGGGAGGCAGCTTCTATGGCTCGGGCTAGCTGATCCATATGTGCAGAATCAATCGCCATTGAGCCAGGATTATCACTTGA  
GCGGCTGCAACGTCATCATGGCTGGCAGTTTATGCAATCTTCAACCAATATTTAAATAGTAAAGAGAAAATTTGACAAGGCTTGCTTG  
ATCAGCCATTTATTGGATTTTGGTCAATCTATGGTACGAACACTAAAATAATAAAAAATTTCGTATATCCGATATAACAAGTG

**MeTHIC2 (form III) – 526 bp** [F<sub>THIC2</sub> – R<sub>THIC2</sub>]

GCCAGCAAGTTATATTAATCCTCTAAGAGGAGCATGTGAGGGGGAAGATTGGTTAAGTCATCATTGGAAGTGTGATGCATGTCTGAG  
TTGTGAGGATGATGGATATGCTGATTTGCTTCCAGATGCAGGGGTGCCTGTATCTGCTTTAATACTGGCCATTTTGGCCAGAGGATAGA  
GCTGGTCAAGGCTGAGAAAGTCCCTTTGAACCTGAACAGGATAATGCCTGCGTAGGGAGTGTGCATTTTCTTTCCCTTTTTCTGTTCTTG  
ACAGGGAGGCAGCTTCTATGGCTCGGGCTAGCTGATCCATATGTGCAGAATCAATCGCCATTGAGCCAGGATTATCACTTGAGCGGC  
TGCAACGTCATCATGGCTGGCAGTTTATGCAATCTTCAACCAATATTTAAATAGTAAAGAGAAAATTTGACAAGGCTTGCTTGATCAGC  
CATTTATTGGATTTTGGTCAATCTATGGTACGAACACTAAAATAATAAAAAATTTCGTATATCCGATATAACAAGTG

**MeTHIC2 (form III) – 534 bp** [F<sub>THIC2</sub> – 3'-RACE nested]

GCCAGCAAGTTATATTAATCCTCTAAGAGGAGCATGTGAGGGGGAAGATTGGTTAAGTCATCATTGGAAGTGTGATGCATGTCTGAG  
TTGTGAGGATGATGGATATGCTGATTTGCTTCCAGATGCAGGGGTGCCTGTATCTGCTTTAATACTGGCCATTTTGGCCAGAGGATAGA  
GCTGGTCAAGGCTGAGAAAGTCCCTTTGAACCTGAACAGGATAATGCCTGCGTAGGGAGTGTGCATTTTCTTTCCCTTTTTCTGTTCTTG  
ACAGGGAGGCAGCTTCTATGGCTCGGGCTAGCTGATCCATATGTGCAGAATCAATCGCCATTGAGCCAGGATTATCACTTGAGCGGC  
TGCAACGTCATCATGGCTGGCAGTTTATGCAATCTTCAACCAATATTTAAATAGTAAAGAGAAAATTTGACAAGGCTTGCTTGATCAGC  
CATTTATTGGATTTTGGTCAATCTATGGTACGAACACTAAAATAATAAAAAATTTCGTATATCCGATATAACAAGTG

**MeTHIC2 (form III) – 553 bp** [F<sub>THIC2</sub> – 3'-RACE nested]

GCCAGCAAGTTATATTAATCCTCTAAGAGGAGCATGTGAGGGGGAAGATTGGTTAAGTCATCATTGGAAGTGTGATGCATGTCTGAG  
TTGTGAGGATGATGGATATGCTGATTTGCTTCCAGATGCAGGGGTGCCTGTATCTGCTTTAATACTGGCCATTTTGGCCAGAGGATAGA  
GCTGGTCAAGGCTGAGAAAGTCCCTTTGAACCTGAACAGGATAATGCCTGCGTAGGGAGTGTGCATTTTCTTTCCCTTTTTCTGTTCTTG  
ACAGGGAGGCAGCTTCTATGGCTCGGGCTAGCTGATCCATATGTGCAGAATCAATCGCCATTGAGCCAGGATTATCACTTGAGCGGC  
TGCAACGTCATCATGGCTGGCAGTTTATGCAATCTTCAACCAATATTTAAATAGTAAAGAGAAAATTTGACAAGGCTTGCTTGATCAGC  
CATTTATTGGATTTTGGTCAATCTATGGTACGAACACTAAAATAATAAAAAATTTCGTATATCCGATATAACAAGTG



TGCAACGTCATCATGGCTGGCAGTTTATGCAATTCTTCAACCAATATTTTAAATAGTAAAGAGAAAATTTGANNAGGCTTGCTTGATCAG  
 CCATTTATTGGATTTTGGTCAATNNATGGTACGAANNNNNAAAANAANNAATTTTCGTATATCCGATNTANNAGTGANNCCNNNNNN  
 NNNNNAAAAAAAAAAAA

**MeTHIC2 (form II) – 281 bp** [F<sub>THIC2</sub> – 3'-RACE nested]

GCCAGCAAGTTATATTAATCCTCTAAGAGGAGCATGTGAGGGGGAAGATTTGGTTAAGTCATCATTGGAAGTGTGATGCATGTCTGAG  
 TTGTGAGGATGATGGATATGCTGATTTGCTTTCCAGATGCAGGTAAGTTGATGATTTAGCGTGTTAGGACCTGGAGACATTATCTTAGTT  
 TGATTCATGTTTCTGCATTAATAAGAAGCGATAATACAGTTGCTACATCTCTTTATGTTCAAGTTATTTCTCTCNNNNNNNTTTAAAAA  
 AAAAAAAAAAAAA

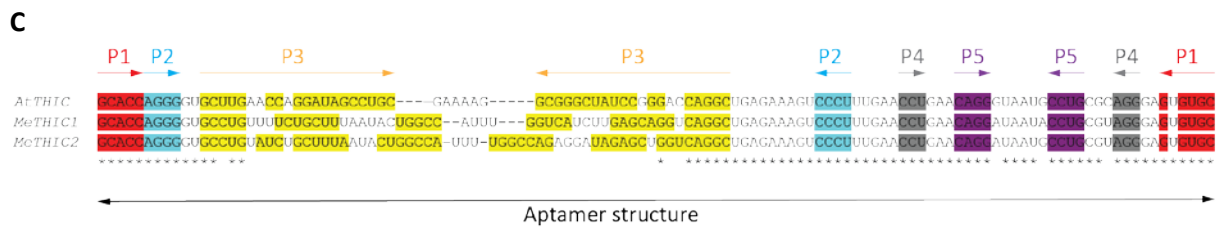

**Supplementary Fig. S5. Sequenced MeTHIC1 and MeTHIC2 3'-UTR splice variants in the cassava accession cv. 60444.**

Sequences of the MeTHIC1 (A) and MeTHIC2 (B) 3'-UTR splice variants amplified from different cDNA templates and using the primers indicated in brackets. Primer sequences or polyA are underlined. The stop codon is indicated by TGA. The intron sequenced in splice form Ia is represented in bold gray. The full-length aptamer is highlighted in yellow and the truncated aptamer present in form III is highlighted in blue. GT and AG represent the splice sites to generate form III. (C) Alignment of Arabidopsis and cassava THIC 3'-UTR aptamer structures. The asterisks indicate the nucleotides conserved between AtTHIC, MeTHIC1 and MeTHIC2. The nucleotides forming the five stems (P1 to P5) are highlighted in color.

## A. *MeTHIC1* (Manes.02G121700)

### > Transcript sequence including intron 4

ATGGCGTCTGTGCAAGCTACTAGTTTGGCTCATCTGTGTGCAAAAATGGCACCCAGAAGTTCCGAGCAGCTCCTTCTTCCGGGTTTGTATGTCGTGGCT  
GGCCGTGGATTATTAAGAAGGAAACTTTACTCGCTCTTGTATCTCATCTATTCCAGAGCCACCTTAACCTTGTATCCTCCAACCTACCAATTAGATAAAA  
TTAAACAGAGGAAGCATACTCTTATCCTTCTTCTCCTGATTTCTTCTCTTCCCTCTTTCGAACAGTGTTCCTCAAGGAGTACAAAAGAATACAGGGAAAT  
TGTTATGAAACAGACTGGCCATGTTCTCAAGGTTCTTTTTCAGGCGGGTCCACTTGTCTGGGGATGAACCTGTTTCGATAAATTATGATACAGTGGTCTCA  
AAACATTAGTCCCCGAACAGGACTTCTAACTGCGTAAAGACTGGGTTGATAGCGGGGAGAAGCTAGGCACACCAAGATACACTCAGATGACTACTGCG  
AAGCAAGGAATAATAACTGAGGAAATGCTGTATTGTGCTGTTCTGAGAGAACTTACCCAGAGTTTGTGAGGTCAGAGGTTGCTCGTGGACGGGCAATAA  
TCCCTTCCAACAAGAAGCACCTAGAATTACAGCCAATGATAGTTGGAAGAAATTTTTGGTCAAAGTCAATGCTAATATTGAAATTTCTGCTGTTGCAAGCT  
CTATTGAGGAAGAAGTTATAAGGTTCAATGGGCAACCATGTGGGCTGCTGACACTGTCATGGACCTTCAACAGGTCGCCACATTACAGAGACCCGTGAA  
TGGATATTACGAAACTCTGCTGTGCCAGTTGAACTGTGCCATCTATCAAGCACTTGAAGAAAGTTAATGGAATCGCTGAAAATCTGAGCTGGGAAAGTCTT  
CAGAGAGACATTGATTGAACAAGCCGAGCAAGGAGTAGATTATTTCACTATCCATGCTGGGGTCTTCTCGGATACATTTCCTTAACTGCAAAACGAATGA  
CAGGAATTGTTTCTCGTGGAGGGTCAATTCATGCCAAGTGGTCTTGGCTTATCACAAGGAAAATTTGCTTATGAACACTGGGATGACATACTTGACATCT  
GTAATCAATATGATGTGCCCTTCAATGGTGTGGGCTGAGACCTGGGTCCATATATGATGCAAAATGACACTGCACAAATTTGACAGAGCTCTTGACTCAG  
GGGAGGCTAACCCGTCGAGCATGGGAGAAGGACGTGCAAGTAATGAATGAAGGACCTGGCCATATTCCTATGCACAAAATCCAGAGAACATGCAAAAA  
CAGCTAGAGTGGTCAATGAAGCACCTTTCTACTCTTGGACCCTGACAACTGATATTGCTCCCGATACGATCACATTACCTCTGCCATTGGTGTGCTGCC  
AACATCGGGCTCTAGGCACTGCACTCTCTGTTATGTACACCAAAAGGAGCCTTGGGTTACCAAAATAGGGATGATGTGAAGGCTGGAGTTATAGCATA  
TAAGATATCTGCACATGCAGCTGATTAGCAAAAGGTCACCTCACGCTCAAGCTGGGATGATGCATTAAGCAAGGCCGATTTGAGTTGAGATGATGGATGG  
ACCAATTTGCTTATCCTTGGACCGATGACAGCAATGTCTTCCATGACGAAACCTGCCATCAGAAGGTGCAAAAGTAGCACATTTTGTCTATGTGTG  
GTCCAAGTTCTGCTCCATGAAGATAACAGAGGATGTGAGGAAGTACGACAGAGGAGCATGGTTATGGTAGCGCAGAGGAAGCTGTACACATGGGATGG  
ATGCTATGAGTGTGAATTCCTGGCTGTAAGAAAATGTTAGCGGAGAACAACATGGTGAAGTTGGTGGAGAAATCTACTGCCGAAAGTTACATTAG  
ATCTCTGAAAGGTGAGGATCAAGTCACTTAACTATAAAGGACTTGTACTAATGGTGGAAAGTTTGAATGCAATCTGTGGATACGATCTGTAGTG  
GAAGTACATAATACATTATTTCTAATTGCAACTCCTAAATGCCTAATTTGCCACTTCAACATCTATAGCAAGATTTAGTGTAAACACGGACCAACCGGAGG  
GAATATAATTTCTCAGCGGTTGCTGGCAAGGAATGTTGCATATGGGAACGTTGTTATCATATGATCACAGTGCCTCTATGTCTCTAAAAGATTGTCA  
ACGCAAGAACTGTAGAGTCTAACTATTTTGAATTTTGAATTTGATGTTAGTCTTGTATGCTAATGCTTACCACCAAGTACCCTATTGGATTGT  
GGTTCGCTTACTGCTGATATCATATTTATTTAAACAGATGGACTGTCATGCTAAAACCTGTAATGAAACGCTTATTGAATTTCTTGCAGGAGCATA  
TGA

### > Translation from *MeTHIC1* transcript sequence excluding intron 4

MetASVQATSFASSVCKNGTQKFPSSSFLPGFDVVAGRGIKKEKTLPRSLISSIPRATLTFDPPTTNSDKIKQRKHTL  
DPSSPDFLPLPSFEQCFPRSTKEYREVVEHQTGHVLPVFRVHLSGDEPCFDNYDTSQPQNSPRTGLPKLRKD  
WVDRREKLGTPRYTQMetYYAKQGIITEEMetLYCAVREKLDPEFVRSSEVARGRAIIPSNKKHLELQPMetIVGRNF  
LVKVNANIGNSAVASSIEEEVYKVQWATMetWGADTVMetDLSTGRHIHETREWILRNSAVPVGTVPYIYQALEKV  
NGIAENLSWEVFRETLEQAEQGVDFYTIHAGVLLRYIPLTAKRMetTGIVSRGGSIHAKWCLAYHKNFAYEHWD  
DILDICNQYDVALSIGDGLRPGSIYDANDTAQFAELLTQGELTRRAWEKDVQVMetNEGPGHIPMetHKIPENMet  
QKQLEWCNEAPFYTLGPLTTDIAPGYDHITSAIGAANIGALGTALLCYVTPKEHLGLPNRDDVKAGVIAKYISAHA  
ADLAKGHPHAQAWDDALSKARFEFRWMetDQFALS LDPMetTAMetSFHDETLPEGAKVAHFCSMetCGPKFCS  
MetKITEDVRKYAEEHGYGSAEEAVQHGMetDAMetSAEFLAAKKT VSGEQHGEVGG EYLPESYIRSSER| Stop

### > Translation from *MeTHIC1* transcript sequence including intron 4

MetASVQATSFASSVCKNGTQKFPSSSFLPGFDVVAGRGIKKEKTLPRSLISSIPRATLTFDPPTTNSDKIKQRKHTL  
DPSSPDFLPLPSFEQCFPRSTKEYREVVEHQTGHVLPVFRVHLSGDEPCFDNYDTSQPQNSPRTGLPKLRKD  
WVDRREKLGTPRYTQMetYYAKQGIITEEMetLYCAVREKLDPEFVRSSEVARGRAIIPSNKKHLELQPMetIVGRNF  
LVKVNANIGNSAVASSIEEEVYKVQWATMetWGADTVMetDLSTGRHIHETREWILRNSAVPVGTVPYIYQALEKV  
NGIAENLSWEVFRETLEQAEQGVDFYTIHAGVLLRYIPLTAKRMetTGIVSRGGSIHAKWCLAYHKNFAYEHWD  
DILDICNQYDVALSIGDGLRPGSIYDANDTAQFAELLTQGELTRRAWEKDVQVMetNEGPGHIPMetHKIPENMet  
QKQLEWCNEAPFYTLGPLTTDIAPGYDHITSAIGAANIGALGTALLCYVTPKEHLGLPNRDDVKAGVIAKYISAHA  
ADLAKGHPHAQAWDDALSKARFEFRWMetDQFALS LDPMetTAMetSFHDETLPEGAKVAHFCSMetCGPKFCS  
MetKITEDVRKYAEEHGYGSAEEAVQHGMetDAMetSAEFLAAKKT VSGEQHGEVGG EYLPESYIRSSER| Stop GSS  
SLKPIKDL| Stop WVKVLELQSVDTICSGST| Stop YIISNCNS| Stop PNLPLQLHLSK| Stop CNTDQPEGI| Stop FSQA  
VAGKECCH| Met GTLLSYDHSALLL| Stop KIVNAENCRVLYTFENFELL| Met LVFV| Met L| Met LDH| QVPLLD| CGSLTA  
| Stop YHIYF| Stop PDGLSSLKTCNETSY| Stop IFLQEH| Met

## B. *MeTHIC2* (Manes.01G164200)

### > Transcript sequence including intron 4

ATGGCATCGGTGCAAGCTACTAGTTTGGCTCTGCTGTGTGCAAAAATGGAAGCCATAAGTTTCAAGCGGCTCCTTCTTCCGGGTTTGTATGGTGTGCTT  
GGCCGTGGATCTTAAGAAGGAAATATGGCCTCGTCTTTGGCGACATCTGTTCTAGGGCCACCTTAACCTTGTATCCTCCAACAACAAATCAGATAAAA  
GCTAAGCAGAGGAAACATACTGTTGATCCTTCTCTCCTGATTTCTTCTCTTCCCTCTTTCGAACAATGTTTCCAAGAAGCACCAAGAATACAGGGAAA  
TTGTTTCATGAAGAAATCCGGTACGCTCCTCAAAGTCTTTCAGACGGGTCCTTGTCTGGGGATGAACCCAGTTTGTATAATTATGATACAGTGGTCTCT

AAAACATTAGTCCCGTATCGAATTCCTAAACTGAGGAAAGACTGGGTTGATAGGCGTGAGAAAGCTAGGCGCACCAAGATACAGTCAGATGTAATGCTG  
 GAAGCAAGGAATAATAACAGAGGAAATGTTATATTGTGCTGCTCGTGAAGAAGCTTACCCAGAGTTTGTGAGGTCAGAGGTTGCTGCTGGACGGCAATA  
 ATCCCTCGAACAAAGACACCTGGAGTTGGAGCAATGATTGTTGGAAGAAATTTTTGGTCAAAGTCAATGCAAAATTTGGAAATCTGCTGTGGCAAG  
 CTCTATTGAGGAAGAAGTTTATAAGGTTCAATGGGCAACCATGTGGGGTGTGACACTGTCTGACCTCTCACTGGTCGGCACATCCATGAGACCCGTG  
 AGTGGATCTTACGAAACTCTGCTGTACCGGTTGGAAGTGTGCCATCTATCAAGCACTTGAAAAAGTTAATGGAATTTGCTGAAATCTGAGCTGGGAAGT  
 TTACAGAGACACATTGATTGAACAAGCTGAGCAGGGTGTAGACTATTTCACTATCCATGCTGGGGTCTTCTACGATACATTCCTTAACTGCTAAACGCAT  
 ACAGGAATGTTTCTGCTGGAGGATCAATTCATGCAAAGTGGTCTTAGCTTATACAAGGAGAATTTGCATATGAACACTGGGATGACATACTTGACAT  
 CTGTAATCAATATGATGTGGCACTTCGATCGGTGATGGGCTGAGACCTGGGTCCATATATGATGCCAATGACACTGCTCAGTTTGAGAGCTCTTGACTCA  
 AGGGAACTAACCCGTAGAGCATGGGAGAAGGATGTACAGGTGATGAATGAAGGACCTGGCCATATTCCTATGCACAAAATCCAGAGAACATGCAAAA  
 ACAGCTCGAATGGTGAATGAAGCACCTTCTACACTCTTGACCCTGACAACTGATATTGCTCCTGGATATGATCACATTACCTGCAATGGTGGTGGC  
 AACATTGGGGCTCTGGCACTGCACTTCTGTTATGTCACACAAAGGAGCATCTGGGTTGCCAAATAGGGATGATGTGAAGGCAGGTGTTATAGCATA  
 TAAGATATCTGCATGACAGCTGATTTAGCAAAGGTCACCCTCATGCTCAAGCCTGGGATGATGCATTAAGCAAGGCCGATTTGAGTTCAGATGGATGG  
 ACCAATTTGCTTTATCTTGACCCCATGACTGCAATGCTTCCATGATGAAACCTGCCATCAGAAGGTGCAAAAGTAGCACATTTTGTCCATGTGTGG  
 GCCGAAGTCTGCTCTATGAAGATAACAGAGGATGTGCGAAAGTATGCGGAAGAGCATGGTTATGGTAGTGCAGAGGAAGCTGTGCAGCAGGGATGG  
 ATGCCATGAGTGTGAGTCTGGCTGCTAAGAAAAGTGTAGTGGAGAACAACATGGTGAAGTTGGTGGGAAATCTACCTGCCAGCAAGTTATATTA  
 ATCCTCTAAGAGTGAAGGATCAAATCAAATAAACCTAAAAAGTCTTACTTTGGTGGAAATCTAGAATTCATTAAGTAAATAATACATTAATCATTT  
 GCAATTCGAAGTACTGCTTACTTAACCATTTACCATCTGACTAGCAAGATTAAAGCAAAGGTCCTGTTCTTGTATCGTAAAGTCTCCAGGCCAAACTT  
 ATTATGGAAGATTGTTGATATTAGTTTCTGTTATGCTACTGTTGAACCATGAAAGTAACTTGTGAGATCATGGTTACATTATGCTTGATATCTCATTTGT  
 GTTTTTTATTTGGTGGACTATGACTTCTCACTTGGAACTTGAATTTTTTTGGAATTTTCTTGCAAGAGCATGTGA

**> Translation from *MeTHIC2* transcript sequence excluding intron 4**

MetASVQATSLSAVCKNGSHKFPSSGSLFPGFDGVLGRGSLKKEIWRSLATSVPRATLTFDPPTTNSDKAKQRKH  
 TVDPSSPDFLPLPSFEQCFPRSTKEYREIVHEESGHVLKVPFRRVHLSGDEPSFDNYDTS GPQNISPRIGIPKLRKD  
 WVDRREKLGAPRYSQ MetYYAKQGIITEE MetLYCAAREKLDPEFVRSEVARGRAIIPSNKKHLELEP MetIVGRNFL  
 VKVNANIGNSAVASSIEEEVYKQWAT MetWGADTV MetDLSTGRHIHETREWILRNSAVPVGTVPIYQALEKVN  
 GIAENLSWEVFRDRLIEQAEQGVDFYTIHAGVLLRYIPLTAKR MetTGIVSRGGSIHAKWCLAYHKENFAYEHWD  
 LDICNQYDVALSIGDGLRPGSIYDANDTAQFAELLTQGELTRRAWEKDVQV MetNEGPGHIP MetHKIPEN MetQ  
 KQLEWCNEAPFYTLGPLTTDIAPGYDHITSAIGAANIGALGTALLCYVTPKEHLGLPNRDDVKAGVIAYKISAHAA  
 DLAKGHPHAQAWDDALS KARFEFRW MetDQFALS LDP MetTA MetSFHDETL PSEGAKVAHFCS MetCGPKFCS  
 MetKITEDVRKYAEEHGYGSAEEAVQHGMetDA MetSAEFLAAKKT VSGEQHGEVGG EYLPASYIKSSKR MetStop

**> Translation from *MeTHIC2* transcript sequence including intron 4**

MetASVQATSLSAVCKNGSHKFPSSGSLFPGFDGVLGRGSLKKEIWRSLATSVPRATLTFDPPTTNSDKAKQRKH  
 TVDPSSPDFLPLPSFEQCFPRSTKEYREIVHEESGHVLKVPFRRVHLSGDEPSFDNYDTS GPQNISPRIGIPKLRKD  
 WVDRREKLGAPRYSQ MetYYAKQGIITEE MetLYCAAREKLDPEFVRSEVARGRAIIPSNKKHLELEP MetIVGRNFL  
 VKVNANIGNSAVASSIEEEVYKQWAT MetWGADTV MetDLSTGRHIHETREWILRNSAVPVGTVPIYQALEKVN  
 GIAENLSWEVFRDRLIEQAEQGVDFYTIHAGVLLRYIPLTAKR MetTGIVSRGGSIHAKWCLAYHKENFAYEHWD  
 LDICNQYDVALSIGDGLRPGSIYDANDTAQFAELLTQGELTRRAWEKDVQV MetNEGPGHIP MetHKIPEN MetQ  
 KQLEWCNEAPFYTLGPLTTDIAPGYDHITSAIGAANIGALGTALLCYVTPKEHLGLPNRDDVKAGVIAYKISAHAA  
 DLAKGHPHAQAWDDALS KARFEFRW MetDQFALS LDP MetTA MetSFHDETL PSEGAKVAHFCS MetCGPKFCS  
 MetKITEDVRKYAEEHGYGSAEEAVQHGMetDA MetSAEFLAAKKT VSGEQHGEVGG EYLPASYIKSSKR Stop GSN  
 SNKPKKVYFYFGGKSRIALS K StopYINHLQLQVHCLLNHFTI StopLARLSKGSCSLLS StopSLQAKLI MetEDCLI LVSV  
 MetLLFEP StopK StopPCEI MetVTLCLISHLCLFLGWT MetTFLTWNLQFFLEFSCRS MetStop

**Supplementary Fig. S6. Translation of *MeTHIC1* and *MeTHIC2* transcript forms Ia (including intron 4) and Ib (excluding intron 4).**

In the *MeTHIC1* (A) and *MeTHIC2* (B) transcript sequences, the five exons are highlighted in blue. Intron 4 is not highlighted. The corresponding protein sequences were obtained by translation of the transcripts excluding or including intron 4 using the ExpAsy translate tool (Artimo *et al.*, 2012). In *MeTHIC1* (A) and *MeTHIC2* (B) protein sequences obtained from the transcripts, the open reading frames are highlighted in blue-green. For each *MeTHIC* homolog, the underlined amino acids correspond to sequence similarity between the two transcripts. The premature stop codon appearing in the transcript forms including intron 4 is highlighted in orange.

**A**

***AtTHIC (At2g29630), 5'-UTR and 1000 bp upstream of the 5'-UTR***

TAGAGAGGGGATGGTTTTATGTACGGATCGGATCGTGCGGGGAAGACAAAATAGAAAAACAACGAGGGAGTTAGTTGCTTACATGTTG  
TTTTCAAAGATATTATTTCTTCTTATTACATACACTTTGAATTTGTTGATCGTGTACTTACATAAAAATGCAGGTTAGGTCCTTTGTTT  
TCGCAGTTTTGCAATTATTTCTCATATTTCTTAATATTGGGCTTTTCACATGTAATAAGCCAACGATAAGACCATGACAATTTCTATACG  
AAACATGATATAAATCTTTGGATACATTATGAATTTACGATATAACAATTAGTTGTTAAATATCAAATATAAATGCGTCAATGGTTG  
TTGTTACTTGTGAGATTATCTTTCTATTTAAGAAGAATAATTCTCTCGTAGATAAAATTTAAAATAATTTCCGAGTTTTCTAATGTTTCT  
AGATATGATTGATTGAACAATAATTCTGGTCTTTGAATGAATATATCGACTGTATTGATTTCAGTTAAACTGATAATAATTGTCAT  
TTACGTCTCAAAGAATTGAAATATCATGTCTCTCAAGATATGGACTTACATATTGTTATGCATTTTATCAAAATATGTGGACAAAACAT  
AATATCAATGTCGCTTTGAGAATAATTGAACAACAGATATTGAGAAATCAATTTTATGGTTATATCAATTGTCATTGCCAACATCTATTAC  
ATAGTAACAGTCCAATTTACATTACAATGGTAATCAATGAAGTAATTTACTTTTTATTGGTTACTCGTGAACGACGTTCTCCTCCTCA  
CGTACCTTATCTAATATCCTGATCAACGGACACCAATTTTCGACAAAATATCTGAGAAAGAGGACACGTCAGCAAGCCTTTGCTTTAG  
GCTGCATTGGGCCGTGACAATTTAGACGATTAGGAGGTTGCTTTCTTTTAAAGGACCCTAATCACTCTGAGTACCCTGACTCACT  
CAGTGTGCGGATTCAATTTCAAACGAGCCAGCCTCTTCTCTCGTCTACTAGATCAGATCCAAAGCTTCTCTTCCAGCTATG

**B**

***MeTHIC1 (Manes.02G121700), 5'-UTR and 1000 bp upstream of the 5'-UTR***

TATCTATAAACGTATGGTGATGGTATGAAGGGTGAACACTGAACAGGCAGCCGTTTCTTAGTTTGCCTTTTTCTCCTCGCCAATCGA  
GCTATTGACGGTGGAGCATTGGAGCTATCATTATCTTCAATCCAATCTTAAATGATCTTGAGTTATAACAACCTCGTTTGATCGGGTCA  
ACGCTTTGCATAAATTTGTTGCCTGGTTACATTGTGTCTAATTTAGGAAATGTTTTAAATTCAGAACCTCATGATGAAAATTTATTACA  
ATTACGTTTTCTCGAAAGTTCTATAGTAATTTATGTGAATTAAGAAAAGGAAATGATATAGTTAAATCAATAAATTATATTATTTTCT  
TGATGACTTGTGTTGTGTAATTTTCTAATGAATCCCTATTCGTAATTTACAATTTAGTTTATACTGTTAATGATAAATTTATTCTC  
TATGAATCTCATTCTACTAGCAAAATATTCCTATTATAAAATTTATTATAAATAACATCCTAATCATTGAAATTTAAATTTTATAATA  
ATTTAATCATTATAGTTTTAATTTTACAATAATTTAGCATTACAGTTCTACGCTTTGAAACAATTTATTTCCATCGATTTAGATTAATTTT  
TTCAATTTATATTAATGGTGAATTTAATAGAAGGATTATTTAATCAATAAAAATAAAACTTAAAAATTTTTAAAAAATAAGAATTAAG  
TGGTAGATTTTAAATTTAATGAATATTAGTGTAGTTTATTTAAATTTTACTTGTGAGTTCGAATATAAAATGATTTTAGACCAAAG  
AAAACATTAATATATTCTCCAATTTAATAACCTATCTATCTCTACTATCCAGTATCCAGTAAGCATTCACTTTTGATAACTTTTTCT  
ACTTTCAAGTCCCTATAAATGAAAAGCCAATCAGAGCTCCTGACATCGCCTACCTTTGGCGCCTACCTTTGGCTGCGTTCAGCGGTTCACT  
TTATGACTCACTCTCTCTCGAGAGATAAGACTCTCTCCTGCAATTCCTCTTCTCTATCTCTGTTGAACGAAATG

**C**

***MeTHIC2 (Manes.01G164200), 5'-UTR and 1000 bp upstream of the 5'-UTR***

AATTAATTAACCAAACAATAAATGAAATCAAGAATCAAATGAGAGTCTATCAATATAAATAAATGATTTAGAAGTTGAGGGGTT  
AATATCTCCTAATTTAAATTCATGTAACAGTCTTTGCCTTTCTGCTCAAATAAATAAATAAATAAATAAATCTTTATCAATTTTATTAAAGCT  
ATTTTTCAACACACAAAAATAAATAAATCAAAATAGCAAAATATACAATATCTTTTTTATTTTACTATATAAATAAATAGTAG  
GATGTGAATTTAATAATATCAAATAATTCAGATATTTATAATAGAGAGGCCATAATTAATTTTATTAGTTACTATGAAAACCTCATTATAT  
TCAAATAAATAAATAATTATCTGTTATTATTTAATATTATGATAATTATTTTAAATTTCTTAAATAGTATTTAAATTTATTATTTANNNNN  
NNNNNNNNNNNNNNNNNNNNNNNNNNNNNNNNNNNNNNNNNNNNNNNNNNNNNNNNNNNNNNNNNNNNNNNNNNNNNNNNNNNNNN  
NNNNNNNNNNNNNNNNNNNNNNNNNNNNNNNNNNNNNNNNNNNNNNNNNNNNNNNNNNNNNNNNNNNNNNNNNNNNNNNNNNNNNN  
NNNNNNNNNNNNNNNNNNNNNNNNNNNNNNNNNNNNNNNNNNNNNNNNNNNNNNNNNNNNNNNNNNNNNNNNNNNNNNNNNNNNNN  
NNNNNNNNNNNNNNNNNNNNNNNNNNNNNNNNNNNNNNNNNNNNNNNNNNNNNNNNNNNNNNNNNNNNNNNNNNNNNNNNNNNNNN  
TTTTAAATATTTTCTCATTTTTTCTTCTCTACTTTGTTATATAATATAGATTAATAAATAAAGGGTTATAGGCAGCCGCCACGGGT  
GAATCTGCGAAATGATCTAACGGTCTCCATTGAGGAGTGTACCTCGAGATGTGCAGACGAGGGTAACCTGCACCCCTGTAGATTTTTAC  
AGATATATCTGACCTCCCAACGTAAGCATTGATTTTGGCGTTTGTGAGTGTGCAGGTGTAGCTGTACCTGCCATATATAAATAAAGG  
CAGAGCGAAGCTTAAAGCTCCCGTGACCTCGCTTACCTTGGGCTGCGTTCGCTGTTCACTTCTCTCCTCACAGTCATCAAGATA  
TAAAGACTCCTCGCTGCATTTCTCGTTTCTCTCTTTGTGACGAAATG

**Supplementary Fig. S7. Analysis for a CCA1 binding motif upstream of the 5'-UTR of Arabidopsis and cassava *THIC* genes.**

The CCA1 binding motif (AAAATATCT) has been reported to be located 128 bp upstream of the 5'-UTR of *AtTHIC* (Bocobza *et al.*, 2013) **(A)**, and could not be detected in the 5'-UTR of either *MeTHIC1* **(B)** or *MeTHIC2* **(C)**. The 5'-UTR sequence is highlighted in blue-green, the start codon (ATG) is highlighted in blue and the CCA1 binding motif is underlined in vermilion. Sequences predicted in Phytozome, *Arabidopsis thaliana* TAIR10 (Lamesch *et al.*, 2012) and *Manihot esculenta* v6.1 (Prochnik *et al.*, 2012) genomes.

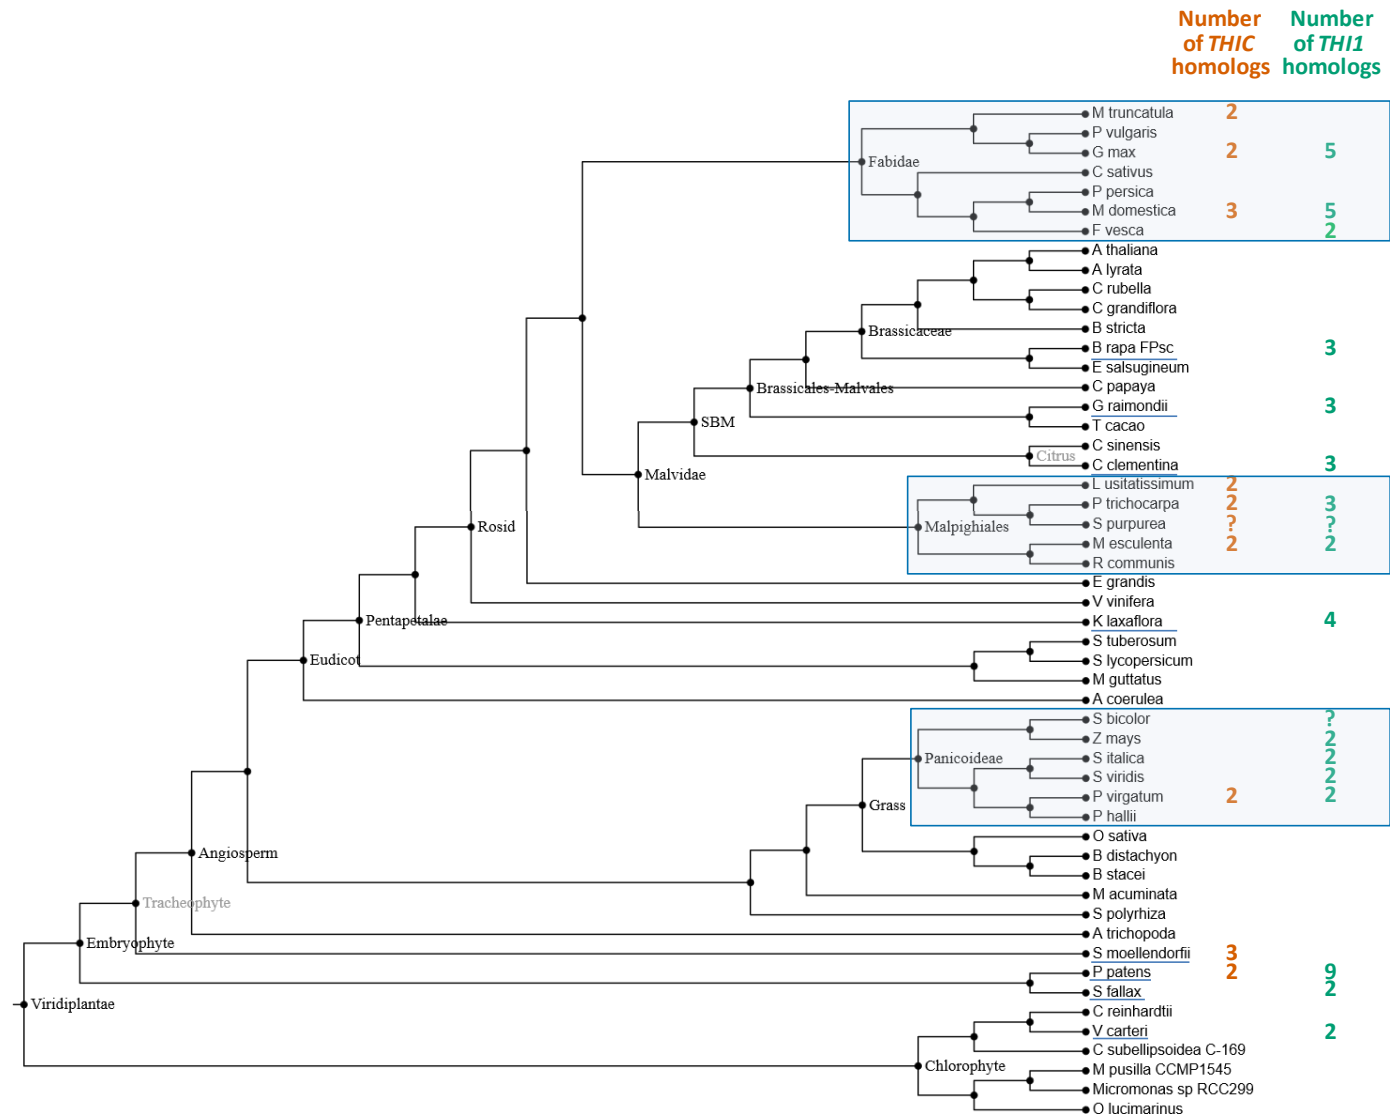

**Supplementary Fig. S8. Number of THIC and THI1 homologs in the genomes available in the Phytozome database.**

Phylogenetic tree representation of the species available in the Phytozome database (Goodstein *et al.*, 2012). In vermilion and blue-green are the number of THIC and THI1 homologs annotated in Phytozome for different plant species, showing a duplication of one or both vitamin B<sub>1</sub> biosynthesis *de novo* genes. Plant species with multiple THIC and/or THI1 homologs are grouped in three main clades (Fabidae, Malpighiales and Panicoideae), which are highlighted in blue boxes.

```

AtTHIC      MAASVCHTCLMSVVCNNKNSARPCLPNSSSLPGFDVQAAATRF----KETTTRAT
MeTHIC1    MASVQATSFASSVCKN---GTQKFPSSSFLPGFDVVAGRGFIKKETLPRSLISSIPRAT
MeTHIC2    MASVQATSLSSAVCKN---GSHKFPSSSFLPGFDVGLGRGSLKKEIWPRLATSVPRAT
           **:      : : * * : *      .   * : * . * : * * * * *      *      :      .      : :      * *

AtTHIC      LTFDPPTTNSERAKQRKHTIDPSSPDFQPIPSFEECFPKSTKEHKVVEESGHVVKVPF
MeTHIC1    LTFDPPTTNSDKIKQRKHTLDPSSPDFLPLPSFEQCFPRSTKEYREVVEHQTGHVVKVPF
MeTHIC2    LTFDPPTTNSDKAKQRKHTVDPSSPDFLPLPSFEQCFPRSTKEYREIVHEESGHVVKVPF
           * * * * * * * * : : * * * * * : * * * * * * * * : : * * * * * : * * * * * : * * * * * : * * * * *

AtTHIC      RRVHLSGGEPAFDNYDTSGPQNVNAHIGLAKLRKEWIDRREKLGTPRYTQMYAKQGIIT
MeTHIC1    RRVHLSGDEPCFDNYDTSGPQNISPRITGLPKLRKDWDRREKLGTPRYTQMYAKQGIIT
MeTHIC2    RRVHLSGDEPSFDNYDTSGPQNISPRIGIPKLRKDWDRREKLGAPRYSQMYAKQGIIT
           * * * * * * * * * * . * * * * * * * * * * : : * : * * * * * : * * * * * * * * : * * * * * * * *

AtTHIC      EEMLYCATREKLDPEFVRSEVARGRAIIPSNKKHLELEPMIVGRKFLVKVNAIGNSAVA
MeTHIC1    EEMLYCAVREKLDPEFVRSEVARGRAIIPSNKKHLELEQPMIVGRNFLVKVNAIGNSAVA
MeTHIC2    EEMLYCAAREKLDPEFVRSEVARGRAIIPSNKKHLELEPMIVGRNFLVKVNAIGNSAVA
           * * * * * * . * * * * * * * * * * * * * * * * * * * * * * * * * * * * * * * * * * * * * * * * * * * * * * * * * * * * * * *

AtTHIC      SSIIEEVYKQVWATMWGADTMDLSTGRHIHETREWILRNSAVPVGTVPVIYQALEKVDGI
MeTHIC1    SSIIEEVYKQVWATMWGADTMDLSTGRHIHETREWILRNSAVPVGTVPVIYQALEKVNGI
MeTHIC2    SSIIEEVYKQVWATMWGADTMDLSTGRHIHETREWILRNSAVPVGTVPVIYQALEKVNGI
           * * * * * * * * * * * * * * * * * * * * * * * * * * * * * * * * * * * * * * * * * * * * * * * * * * * * * * * * * * * * * *

AtTHIC      AENLNWEVFRETLIEQAEQGVDFYFTIHAGVLLRYIPLTAKRLTGIVSRGGSIHAKWCLAY
MeTHIC1    AENLSWEVFRDTLIEQAEQGVDFYFTIHAGVLLRYIPLTAKRMTGIVSRGGSIHAKWCLAY
MeTHIC2    AENLSWEVFRDTLIEQAEQGVDFYFTIHAGVLLRYIPLTAKRMTGIVSRGGSIHAKWCLAY
           * * * * . * * * * : * * * * * * * * * * * * * * * * * * * * * * * * * * * * * * * * * * * * * * * * * * * * * * * * * * * * * * * *

AtTHIC      HKENFAYEHWDDILDICNQYDVALSIGDGLRPGSIYDANDTAQFAELLTQGELTRRAWEK
MeTHIC1    HKENFAYEHWDDILDICNQYDVALSIGDGLRPGSIYDANDTAQFAELLTQGELTRRAWEK
MeTHIC2    HKENFAYEHWDDILDICNQYDVALSIGDGLRPGSIYDANDTAQFAELLTQGELTRRAWEK
           * * * * * * * * * * * * * * * * * * * * * * * * * * * * * * * * * * * * * * * * * * * * * * * * * * * * * * * * * * * * * *

AtTHIC      DVQVMNEGPGHIPMHKIPENMQKQLEWCNEAPFYTLGPLTTDIAPGYDHITSAIGANIG
MeTHIC1    DVQVMNEGPGHIPMHKIPENMQKQLEWCNEAPFYTLGPLTTDIAPGYDHITSAIGANIG
MeTHIC2    DVQVMNEGPGHIPMHKIPENMQKQLEWCNEAPFYTLGPLTTDIAPGYDHITSAIGANIG
           * * * * * * * * : * * * * * * * * * * * * * * * * * * * * * * * * * * * * * * * * * * * * * * * * * * * * * * * * * * * * *

AtTHIC      ALGTALLCYVTPKEHLGLPNRDDVKAGVIAKYIAHAADLAKQHPHAQAWDDALSKARFE
MeTHIC1    ALGTALLCYVTPKEHLGLPNRDDVKAGVIAKYISAHAADLAKGHPHAQAWDDALSKARFE
MeTHIC2    ALGTALLCYVTPKEHLGLPNRDDVKAGVIAKYISAHAADLAKGHPHAQAWDDALSKARFE
           * * * * * * * * * * * * * * * * * * * * * * * * * * * * * * * * * * * * * * * * * * * * * * * * * * * * * * * * * * * * * *

AtTHIC      FRWMDQFALS LDPMTAMSFHDETL PADGAKVAHF CSMCGPKFC SMKITEDIRKYAEENGY
MeTHIC1    FRWMDQFALS LDPMTAMSFHDETL PSEGAKVAHF CSMCGPKFC SMKITEDVRKYAEHGY
MeTHIC2    FRWMDQFALS LDPMTAMSFHDETL PSEGAKVAHF CSMCGPKFC SMKITEDVRKYAEHGY
           * * * * * * * * * * * * * * * * * * * * * * * * * * * * * * * * * * * * * * * * * * * * * * * * * * * * * * * * * * * * * *

AtTHIC      GSAAEAIRQGM DAMSEEFNI AKKTI SGEQHGEVGG E IYLPESYV KAAQK * --
MeTHIC1    GSAAEAVQHGM DAMSAEFLAAKKT VSGEQHGEVGG E IYLPESYIRSSERSI *
MeTHIC2    GSAAEAVQHGM DAMSAEFLAAKKT VSGEQHGEVGG E IYLPASYIKSSKRSM *
           * * * * * * : : * * * * * * * * * * * * * * * * * * * * * * * * * * * * : : : : : : : :

```

**Supplementary Fig. S9. Alignment of THIC protein sequences from Arabidopsis and cassava**  
Alignment of AtTHIC (encoded by At2g29630), MeTHIC1 (encoded by Manes.02G121700, 87% identity with AtTHI1) and MeTHIC2 (encoded by Manes.01G164200, 87% identity with AtTHI1) protein sequences. The residues involved in the main binding sites are conserved in MeTHIC1 and MeTHIC2. The residues responsible for the iron sulfur cluster (consensus amino acid motif CX<sub>2</sub>CX<sub>4</sub>C, where X represents any amino acid) are highlighted in purple; the residues responsible for the AIR substrate binding site are highlighted in yellow; the conserved histidine residues responsible for the iron binding site are highlighted in blue. The sequence in blue box corresponds to the central domain of the protein (residues 224 - 519) containing the (β/α)<sub>8</sub> TIM barrel, where the active site is located. The differences in amino acid sequence between MeTHIC1 and MeTHIC2 in the central domain are depicted in vermilion.

Supplementary Table S1. Description of the 41 cassava accessions selected for quantification of vitamin B<sub>1</sub> content.

|        | Accession number | Synonyms                                         | Common name              | Species                  | Biological status                                       | Origin       |
|--------|------------------|--------------------------------------------------|--------------------------|--------------------------|---------------------------------------------------------|--------------|
| Africa | TMe-3            | -                                                | 2nd Agric                | <i>Manihot esculenta</i> | Traditional accession/Landrace                          | Nigeria      |
|        | TMe-7            | Tme-3349, TMe-3350, TMe-3321, TMe-3352, TMe-3440 | Oko-iyawo                | <i>M. esculenta</i>      | Traditional accession/Landrace                          | Nigeria      |
|        | TMe-14           | -                                                | Abbey-ife                | <i>M. esculenta</i>      | Traditional accession/Landrace                          | Nigeria      |
|        | TMS 30001        | -                                                | MNga-1                   | <i>M. esculenta</i>      | Improved-Line (lost pedigree)                           | Nigeria      |
|        | TMS 30555        | -                                                | -                        | <i>M. esculenta</i>      | Improved-Line (58308 x Oyarugba Dudu)                   | Nigeria      |
|        | TMS 30572        | -                                                | -                        | <i>M. esculenta</i>      | Improved-Line (58308 x Branca de Santa Caterina)        | Nigeria      |
|        | cv. 60444        | TMS 60444                                        | -                        | <i>M. esculenta</i>      | Benchmark model accession                               | Nigeria      |
|        | Ebwanateraka     | -                                                | -                        | <i>M. esculenta</i>      | Traditional accession/Landrace                          | Uganda       |
|        | Kibandameno WT64 | -                                                | -                        | <i>M. esculenta</i>      | Traditional accession/Landrace                          | Kenya        |
|        | Kibaha           | -                                                | -                        | <i>M. esculenta</i>      | Improved variety                                        | Tanzania     |
|        | KBH 2006/18      | -                                                | -                        | <i>M. esculenta</i>      | Elite breeding lines from the IITA                      | Tanzania     |
|        | KBH 2006/26      | -                                                | -                        | <i>M. esculenta</i>      | Elite breeding lines from the IITA                      | Tanzania     |
|        | T 200            | -                                                | -                        | <i>M. esculenta</i>      | Traditional accession/Landrace                          | South Africa |
| Asia   | KU50             | -                                                | Kasetsart 50             | <i>M. esculenta</i>      | Improved-Line                                           | Thailand     |
|        | SC8              | -                                                | -                        | <i>M. esculenta</i>      | Traditional accession/Landrace                          | China        |
|        | SC124            | -                                                | -                        | <i>M. esculenta</i>      | Traditional accession/Landrace                          | China        |
|        | TAI 8            | -                                                | Cmr<br>246343(Rayong 60) | <i>M. esculenta</i>      | Improved-Line                                           | Thailand     |
|        | TAI 3            | -                                                | Rayong 3                 | <i>M. esculenta</i>      | Improved-Line                                           | Thailand     |
|        | H226             | -                                                | -                        | <i>M. esculenta</i>      | Improved commercial hybrid                              | India        |
|        | KM140            | -                                                | -                        | <i>M. esculenta</i>      | Improved line (KM98-1 x KM 36)                          | Vietnam      |
|        | KM397            | -                                                | -                        | <i>M. esculenta</i>      | Improved line (SM937-26 SM937-26 x) x (x BKA900 BKA900) | Vietnam      |
|        | 11SA12           | -                                                | -                        | <i>M. esculenta</i>      | -                                                       | Vietnam      |

Supplementary Table S1 (continued)

|                           | Accession number | Synonyms             | Common name    | Species                   | Biological status                      | Origin    |
|---------------------------|------------------|----------------------|----------------|---------------------------|----------------------------------------|-----------|
| South and Central America | ECU 72           | 072                  | Injerta        | <i>M. esculenta</i>       | Traditional accession/Landrace         | Ecuador   |
|                           | COL 22           | COR-313              | Uvita          | <i>M. esculenta</i>       | Traditional accession/Landrace         | Colombia  |
|                           | PER 183          | -                    | Eeat 1         | <i>M. esculenta</i>       | Traditional accession/Landrace         | Peru      |
|                           | COL 1505         | BRA-001007, CMC 76   | Ucv 2096       | <i>M. esculenta</i>       | Traditional accession/Landrace         | Venezuela |
|                           | CM 2177-2        | -                    | Cebucan        | <i>M. esculenta</i>       | Improved-Line (CM 430-37 x CM 840-138) | Colombia  |
|                           | MEX 95           | -                    | -              | <i>M. esculenta</i>       | Traditional accession/Landrace         | Mexico    |
|                           | BRA 132          | BGM 0186, BRA-006670 | Mendubi        | <i>M. esculenta</i>       | Traditional accession/Landrace         | Brazil    |
|                           | ARG 13           | -                    | B1-15-3-73     | <i>M. esculenta</i>       | Traditional accession/Landrace         | Argentina |
|                           | GUA 79           | 884                  | Yuca Colorada  | <i>M. esculenta</i>       | Traditional accession/Landrace         | Guatemala |
|                           | CM 523-7         | -                    | Catumare       | <i>M. esculenta</i>       | Improved-Line (COL 655A x COL 1515)    | Colombia  |
|                           | SG 107-35        | -                    | -              | <i>M. esculenta</i>       | Improved-Line (VAR 5)                  | Colombia  |
|                           | PSE XXX-1        | -                    | -              | <i>M. pseudoglaziovii</i> | Wild                                   | Brazil    |
|                           | TST XXX-18       | -                    | -              | <i>M. tristis</i>         | Wild                                   | Brazil    |
|                           | VEN 25           | UCV 2076, 025        | Querepa Amarga | <i>M. esculenta</i>       | Traditional accession/Landrace         | Venezuela |
|                           | BRA 685          | BRA-068471           | Amarelinha     | <i>M. esculenta</i>       | Traditional accession/Landrace         | Brazil    |
|                           | CM 6438-14       | -                    | -              | <i>M. esculenta</i>       | Improved-Line ( CM 1335-4 x CM 2298-3) | Colombia  |
|                           | BRA 293          | BGM 0549, BRA-012611 | Amansa Burro   | <i>M. esculenta</i>       | Traditional accession/Landrace         | Brazil    |
|                           | BRA 325          | BGM 1165, BRA-002291 | Tapioqueira    | <i>M. esculenta</i>       | Traditional accession/Landrace         | Brazil    |
|                           | BRA 222          | BGM 0374, BRA-002356 | Verdinha       | <i>M. esculenta</i>       | Traditional accession/Landrace         | Brazil    |



Supplementary Table S2. Primers used for PCR amplification of *MeTHIC1* and *MeTHIC2* 3'-UTR splice variants.

| Target gene           | Gene reference  | Primer name        | Primer sequence (5' - 3')   |
|-----------------------|-----------------|--------------------|-----------------------------|
| <b><i>MeTHIC1</i></b> | Manes.02G121700 | F <sub>THIC1</sub> | CCGGAAAGTTACATTAGATCTTCTGAA |
|                       |                 | R <sub>THIC1</sub> | GCAAGCAATTAAGGATTAAC        |
| <b><i>MeTHIC2</i></b> | Manes.01G164200 | F <sub>THIC2</sub> | GCCAGCAAGTTATATTAATCCTCTAAG |
|                       |                 | R <sub>THIC2</sub> | CACTTGTTATATCGGATATAACG     |
| -                     | -               | 3'-RACE primer     | GCTGTCAACGATACGCTACGTAACG   |
| -                     | -               | 3'-RACE nested     | CGCTACGTAACGGCATGACAGTG     |

**Supplementary Table S3. Primers used for RT-qPCR analysis.**

It should be noted that primer pairs MeTHIC1-F/MeTHIC1-R and MeTHIC2-F/MeTHIC2-R can amplify *THIC* transcripts Ib, II and III but not Ia.

| Target gene           | Gene reference  | Primer name            | Primer sequence (5' - 3')                               |
|-----------------------|-----------------|------------------------|---------------------------------------------------------|
| <b><i>MePP2A</i></b>  | Manes.09G039900 | PP2A-F<br>PP2A-R       | TGCAAGGCTCACACTTTCATC<br>CTGAGCGTAAAGCAGGGAAG           |
| <b><i>MeUBQ10</i></b> | Manes.07G019300 | UBQ10_F<br>UBQ10-R     | TGCATCTCGTTCTCCGATTG<br>GCGAAGATCAGTCGTTGTTGG           |
| <b><i>MevATPs</i></b> | Manes.08G064200 | vATPs_F<br>vATPs_R     | GTTGAATGGCTTTGTGCTCAG<br>CCATCTGCGTGAACAAAAGAA          |
| <b><i>MeTHIC1</i></b> | Manes.02G121700 | MeTHIC1_F<br>MeTHIC1-R | ATGAGTGCTGAGTTCCTGGCTG<br>GCTTTTTTGACCAAATCCCTGG        |
| <b><i>MeTHIC2</i></b> | Manes.01G164200 | MeTHIC2-F<br>MeTHIC2-R | GTTAGTGGAGAACAACATGGTGAAG<br>CATATCCATCATCCTCACAACTCAGA |
| <b><i>MeTHI1a</i></b> | Manes.15G075600 | MeTHI1a-F<br>MeTHI1a-R | CATGGAGGTTGCGGAGATTG<br>AAACTCTGGGCGAAGGGTAA            |
| <b><i>MeTHI1b</i></b> | Manes.03G123800 | MeTHI1b-F<br>MeTHI1b-R | CATGGAAGTTGCAGAGATTG<br>CAAATTCTGGGCTTCGCTTGT           |

**Supplementary Table S4. Phenotypic characterization of greenhouse grown cassava accessions.**

**(A)** Evaluation of plant height, above-ground (leaves and stem) fresh weight and storage root fresh weight in 41 cassava accessions. Average  $\pm$  S.D. of 3 biological replicates (except for TMS 30572 (n=2) for aboveground phenotype and for TMS 30572 (n=2), MEX 95 (n=2) and PSE XXX-1 (n=2) for under-ground phenotype). Tukey's multiple comparison test ( $p < 0.05$ ). **(B)** Repeated independent evaluation of plant height, above-ground fresh weight, number of leaves, leaf retention (leaves retained at harvest time/total number of leaves), under-ground fresh weight and number of storage roots in 18 selected accessions. Average  $\pm$  S.D. of 4 biological replicates (except for CM2177-2 (n=1) and TST XXX-18 (n=3) for above-ground phenotype and CM2177-2 (n=1), TST XXX-18 (n=1) and MEX95 (n=3) for underground phenotype). Tukey's multiple comparison test ( $p < 0.05$ ).

| Accessions   | A. Preliminary phenotypic characterization<br>of 41 cassava accessions |                                          |                                    | B. Repeated independent phenotypic characterization<br>of 18 selected cassava accessions |                                     |                                   |                                    |                                    |                                   |
|--------------|------------------------------------------------------------------------|------------------------------------------|------------------------------------|------------------------------------------------------------------------------------------|-------------------------------------|-----------------------------------|------------------------------------|------------------------------------|-----------------------------------|
|              | Plant height (cm)                                                      | Above-ground<br>FW (g)                   | Under-ground<br>FW (g)             | Plant height<br>(cm)                                                                     | Above-ground<br>FW (g)              | Number of<br>leaves               | Leaf retention<br>(%)              | Under-ground<br>FW (g)             | Number of<br>storage roots        |
| TMe-3        | 113.3 [ $\pm 18.7$ ] <sup>abcdef</sup>                                 | 51.0 [ $\pm 9.5$ ] <sup>abcdef</sup>     | 47.2 [ $\pm 16.2$ ] <sup>abc</sup> | 90.6 [ $\pm 20.6$ ] <sup>abcd</sup>                                                      | 55.7 [ $\pm 12.6$ ] <sup>bcd</sup>  | 20.3 [ $\pm 2.2$ ] <sup>abc</sup> | 84.3 [ $\pm 7.3$ ] <sup>abcd</sup> | 26.7 [ $\pm 5.1$ ] <sup>ab</sup>   | 3.0 [ $\pm 1.6$ ] <sup>a</sup>    |
| TMe-7        | 102.0 [ $\pm 13.2$ ] <sup>abcdef</sup>                                 | 64.5 [ $\pm 4.7$ ] <sup>bcdefghi</sup>   | 39.7 [ $\pm 14.1$ ] <sup>abc</sup> | 112.0 [ $\pm 23.1$ ] <sup>cde</sup>                                                      | 79.9 [ $\pm 10.0$ ] <sup>cdef</sup> | 24.3 [ $\pm 1.0$ ] <sup>cde</sup> | 98.0 [ $\pm 2.3$ ] <sup>e</sup>    | 38.4 [ $\pm 3.3$ ] <sup>abc</sup>  | 4.8 [ $\pm 0.5$ ] <sup>abc</sup>  |
| TMe-14       | 122.0 [ $\pm 26.2$ ] <sup>bcdef</sup>                                  | 90.0 [ $\pm 19.4$ ] <sup>hij</sup>       | 35.0 [ $\pm 16.4$ ] <sup>abc</sup> |                                                                                          |                                     |                                   |                                    |                                    |                                   |
| TMS 30001    | 84.3 [ $\pm 11.8$ ] <sup>abcde</sup>                                   | 45.7 [ $\pm 4.7$ ] <sup>abcd</sup>       | 35.8 [ $\pm 11.7$ ] <sup>abc</sup> |                                                                                          |                                     |                                   |                                    |                                    |                                   |
| TMS 30555    | 112.3 [ $\pm 18.6$ ] <sup>abcdef</sup>                                 | 73.6 [ $\pm 13.6$ ] <sup>bcdefghij</sup> | 37.3 [ $\pm 23.1$ ] <sup>abc</sup> |                                                                                          |                                     |                                   |                                    |                                    |                                   |
| TMS 30572    | 97.0 [ $\pm 12.7$ ] <sup>abcdef</sup>                                  | 43.3 [ $\pm 7.2$ ] <sup>abcd</sup>       | 53.4 [ $\pm 6.4$ ] <sup>abc</sup>  | 90.0 [ $\pm 22.6$ ] <sup>abcd</sup>                                                      | 61.3 [ $\pm 17.6$ ] <sup>bcde</sup> | 21.5 [ $\pm 2.6$ ] <sup>cd</sup>  | 95.6 [ $\pm 5.9$ ] <sup>de</sup>   | 33.1 [ $\pm 7.8$ ] <sup>abc</sup>  | 8.5 [ $\pm 1.0$ ] <sup>cd</sup>   |
| cv. 60444    | 94.0 [ $\pm 21.0$ ] <sup>abcdef</sup>                                  | 63.8 [ $\pm 10.8$ ] <sup>bcdefghi</sup>  | 61.7 [ $\pm 13.3$ ] <sup>abc</sup> | 82.1 [ $\pm 19.6$ ] <sup>abcd</sup>                                                      | 58.6 [ $\pm 15.5$ ] <sup>bcde</sup> | 22.5 [ $\pm 1.7$ ] <sup>cde</sup> | 97.0 [ $\pm 3.7$ ] <sup>e</sup>    | 36.6 [ $\pm 1.5$ ] <sup>abc</sup>  | 7.0 [ $\pm 1.4$ ] <sup>abcd</sup> |
| Ebwanateraka | 135.0 [ $\pm 26.9$ ] <sup>cdefg</sup>                                  | 81.9 [ $\pm 17.5$ ] <sup>efghij</sup>    | 60.0 [ $\pm 20.3$ ] <sup>abc</sup> |                                                                                          |                                     |                                   |                                    |                                    |                                   |
| Kibandameno  | 122.0 [ $\pm 15.7$ ] <sup>bcdef</sup>                                  | 64.8 [ $\pm 7.6$ ] <sup>bcdefghi</sup>   | 32.7 [ $\pm 18.2$ ] <sup>abc</sup> |                                                                                          |                                     |                                   |                                    |                                    |                                   |
| Kibaha       | 129.0 [ $\pm 9.5$ ] <sup>cdefg</sup>                                   | 88.7 [ $\pm 12.5$ ] <sup>ghij</sup>      | 55.5 [ $\pm 9.2$ ] <sup>abc</sup>  | 125.4 [ $\pm 3.5$ ] <sup>de</sup>                                                        | 68.0 [ $\pm 5.8$ ] <sup>bcdef</sup> | 24.3 [ $\pm 1.0$ ] <sup>cde</sup> | 91.7 [ $\pm 5.6$ ] <sup>bcde</sup> | 19.9 [ $\pm 8.5$ ] <sup>a</sup>    | 4.5 [ $\pm 1.3$ ] <sup>ab</sup>   |
| KBH 2006/18  | 97.7 [ $\pm 25.3$ ] <sup>abcdef</sup>                                  | 45.2 [ $\pm 9.3$ ] <sup>abc</sup>        | 79.3 [ $\pm 20.1$ ] <sup>c</sup>   | 103.3 [ $\pm 30.2$ ] <sup>cd</sup>                                                       | 58.6 [ $\pm 9.4$ ] <sup>bcde</sup>  | 25.0 [ $\pm 0.8$ ] <sup>de</sup>  | 96.3 [ $\pm 2.9$ ] <sup>de</sup>   | 51.8 [ $\pm 17.7$ ] <sup>bc</sup>  | 5.3 [ $\pm 0.5$ ] <sup>abcd</sup> |
| KBH 2006/26  | 159.7 [ $\pm 14.3$ ] <sup>fg</sup>                                     | 77.7 [ $\pm 5.9$ ] <sup>cdefghij</sup>   | 41.5 [ $\pm 12.4$ ] <sup>abc</sup> |                                                                                          |                                     |                                   |                                    |                                    |                                   |
| T 200        | 96.0 [ $\pm 15.6$ ] <sup>abcdef</sup>                                  | 51.1 [ $\pm 6.2$ ] <sup>abcdef</sup>     | 0                                  |                                                                                          |                                     |                                   |                                    |                                    |                                   |
| ECU 72       | 107.3 [ $\pm 33.3$ ] <sup>abcdef</sup>                                 | 65.7 [ $\pm 8.7$ ] <sup>bcdefghi</sup>   | 51.8 [ $\pm 26.5$ ] <sup>abc</sup> |                                                                                          |                                     |                                   |                                    |                                    |                                   |
| COL 22       | 134.3 [ $\pm 26.7$ ] <sup>cdefg</sup>                                  | 72.3 [ $\pm 11.6$ ] <sup>bcdefghij</sup> | 43.6 [ $\pm 12.5$ ] <sup>abc</sup> | 127.1 [ $\pm 15.1$ ] <sup>de</sup>                                                       | 82.2 [ $\pm 6.3$ ] <sup>def</sup>   | 23.8 [ $\pm 1.5$ ] <sup>cde</sup> | 94.0 [ $\pm 5.2$ ] <sup>de</sup>   | 35.9 [ $\pm 13.0$ ] <sup>abc</sup> | 7.8 [ $\pm 2.1$ ] <sup>bcd</sup>  |
| PER 183      | 105.0 [ $\pm 18.7$ ] <sup>abcdef</sup>                                 | 48.3 [ $\pm 9.2$ ] <sup>abcde</sup>      | 32.0 [ $\pm 5.5$ ] <sup>abc</sup>  |                                                                                          |                                     |                                   |                                    |                                    |                                   |
| COL 1505     | 96.0 [ $\pm 25.5$ ] <sup>abcdef</sup>                                  | 58.0 [ $\pm 16.8$ ] <sup>bcdefghi</sup>  | 35.2 [ $\pm 19.0$ ] <sup>abc</sup> | 93.8 [ $\pm 14.6$ ] <sup>bcd</sup>                                                       | 61.4 [ $\pm 11.6$ ] <sup>bcde</sup> | 21.5 [ $\pm 1.9$ ] <sup>cd</sup>  | 87.1 [ $\pm 9.0$ ] <sup>bcde</sup> | 20.7 [ $\pm 4.6$ ] <sup>a</sup>    | 3.8 [ $\pm 1.0$ ] <sup>a</sup>    |
| CM 2177-2    | 92.7 [ $\pm 10.1$ ] <sup>abcdef</sup>                                  | 51.1 [ $\pm 5.1$ ] <sup>abcdef</sup>     | 29.8 [ $\pm 13.2$ ] <sup>ab</sup>  | 85.0                                                                                     | 67.4                                | 25.0                              | 96.2                               | 16.7                               | 2.0                               |
| MEX 95       | 102.0 [ $\pm 7.0$ ] <sup>abcdef</sup>                                  | 59.2 [ $\pm 8.9$ ] <sup>bcdefghi</sup>   | 26.8 [ $\pm 18.9$ ] <sup>abc</sup> | 107.8 [ $\pm 29.9$ ] <sup>cd</sup>                                                       | 66.7 [ $\pm 8.2$ ] <sup>bcdef</sup> | 23.0 [ $\pm 2.4$ ] <sup>cde</sup> | 81.3 [ $\pm 5.7$ ] <sup>ab</sup>   | 8.1 [ $\pm 3.5$ ] <sup>a</sup>     | 4.0 [ $\pm 0.0$ ] <sup>ab</sup>   |
| BRA 132      | 71.3 [ $\pm 17.9$ ] <sup>abc</sup>                                     | 54.7 [ $\pm 10.7$ ] <sup>abcdefg</sup>   | 48.0 [ $\pm 15.8$ ] <sup>abc</sup> | 64.5 [ $\pm 2.7$ ] <sup>abc</sup>                                                        | 61.6 [ $\pm 15.0$ ] <sup>bcde</sup> | 23.5 [ $\pm 3.1$ ] <sup>cde</sup> | 97.2 [ $\pm 3.7$ ] <sup>e</sup>    | 53.1 [ $\pm 32.4$ ] <sup>bc</sup>  | 5.5 [ $\pm 1.9$ ] <sup>abcd</sup> |

Supplementary Table S4 (continued)

| Accessions | A. Preliminary phenotypic characterization<br>of 41 cassava accessions |                                   |                             | B. Repeated independent phenotypic characterization<br>of 18 selected cassava accessions |                              |                             |                             |                            |                            |
|------------|------------------------------------------------------------------------|-----------------------------------|-----------------------------|------------------------------------------------------------------------------------------|------------------------------|-----------------------------|-----------------------------|----------------------------|----------------------------|
|            | Plant height (cm)                                                      | Above-ground<br>FW (g)            | Under-ground<br>FW (g)      | Plant height<br>(cm)                                                                     | Above-ground<br>FW (g)       | Number of<br>leaves         | Leaf retention<br>(%)       | Under-ground<br>FW (g)     | Number of<br>storage roots |
| ARG 13     | 141.7 [±15.3] <sup>defg</sup>                                          | 76.6 [±7.4] <sup>bcdefghi</sup>   | 50.9 [±10.6] <sup>abc</sup> | 157.9 [±6.0] <sup>e</sup>                                                                | 88.2 [±4.9] <sup>ef</sup>    | 21.0 [±0.0] <sup>bcd</sup>  | 73.7 [±1.5] <sup>a</sup>    | 27.1 [±6.8] <sup>ab</sup>  | 5.5 [±1.3] <sup>abcd</sup> |
| GUA 79     | 112.7 [±16.3] <sup>abcdef</sup>                                        | 72.5 [±16.0] <sup>bcdefghij</sup> | 20.5 [±10.3] <sup>a</sup>   | 158.4 [±6.2] <sup>e</sup>                                                                | 96.5 [±4.5] <sup>f</sup>     | 20.5 [±1.0] <sup>abcd</sup> | 97.7 [±4.5] <sup>e</sup>    | 10.0 [±0.9] <sup>a</sup>   | 3.3 [±1.7] <sup>a</sup>    |
| CM 523-7   | 141.0 [±7.9] <sup>defg</sup>                                           | 79.5 [±6.8] <sup>defghij</sup>    | 33.1 [±12.3] <sup>abc</sup> |                                                                                          |                              |                             |                             |                            |                            |
| SG 107-35  | 130.0 [±9.6] <sup>cdefg</sup>                                          | 76.4 [±5.2] <sup>bcdefghij</sup>  | 22.8 [±7.0] <sup>a</sup>    |                                                                                          |                              |                             |                             |                            |                            |
| PSE XXX-1  | 138.0 [±18.2] <sup>cdefg</sup>                                         | 51.6 [±9.6] <sup>abcdef</sup>     | 18.4 [±6.6] <sup>a</sup>    | 98.3 [±18.9] <sup>bcd</sup>                                                              | 41.0 [±12.4] <sup>ab</sup>   | 16.0 [±0.8] <sup>a</sup>    | 82.2 [±4.5] <sup>abc</sup>  | 11.2 [±4.5] <sup>a</sup>   | 5.3 [±1.7] <sup>abcd</sup> |
| TST XXX-18 | 138.7 [±12.4] <sup>cdefg</sup>                                         | 71.1 [±5.9] <sup>bcdefghij</sup>  | 26.4 [±7.8] <sup>ab</sup>   | 111.7 [±37.6] <sup>cde</sup>                                                             | 41.7 [±19.0] <sup>ab</sup>   | 22.3 [±3.1] <sup>cde</sup>  | 98.7 [±2.2] <sup>e</sup>    | 32.13                      | 6.0                        |
| VEN 25     | 151.3 [±3.5] <sup>efg</sup>                                            | 63.8 [±3.4] <sup>bcdefghi</sup>   | 29.3 [±6.2] <sup>ab</sup>   |                                                                                          |                              |                             |                             |                            |                            |
| BRA 685    | 139.3 [±8.3] <sup>cdefg</sup>                                          | 90.8 [±0.9] <sup>ij</sup>         | 30.1 [±12.1] <sup>ab</sup>  |                                                                                          |                              |                             |                             |                            |                            |
| CM 6438-14 | 137.3 [±4.2] <sup>cdefg</sup>                                          | 72.6 [±8.8] <sup>bcdefghij</sup>  | 33.6 [±17.1] <sup>abc</sup> |                                                                                          |                              |                             |                             |                            |                            |
| BRA 293    | 149.7 [±31.3] <sup>efg</sup>                                           | 83.4 [±12.4] <sup>fghij</sup>     | 21.3 [±5.5] <sup>a</sup>    |                                                                                          |                              |                             |                             |                            |                            |
| BRA 325    | 195.0 [±12.2] <sup>g</sup>                                             | 89.4 [±7.4] <sup>hij</sup>        | 46.6 [±6.4] <sup>abc</sup>  |                                                                                          |                              |                             |                             |                            |                            |
| BRA 222    | 100.3 [±21.1] <sup>abcdef</sup>                                        | 56.6 [±6.0] <sup>bcdefgh</sup>    | 32.3 [±3.0] <sup>abc</sup>  |                                                                                          |                              |                             |                             |                            |                            |
| KU50       | 122.3 [±5.1] <sup>bcdef</sup>                                          | 65.7 [±5.0] <sup>bcdefghi</sup>   | 55.7 [±7.0] <sup>abc</sup>  | 114.8 [±16.5] <sup>de</sup>                                                              | 74.7 [±13.5] <sup>cdef</sup> | 22.3 [±1.0] <sup>cd</sup>   | 93.9 [±4.1] <sup>cde</sup>  | 34.2 [±6.3] <sup>abc</sup> | 4.3 [±1.3] <sup>ab</sup>   |
| SC8        | 47.0 [±6.2] <sup>a</sup>                                               | 43.0 [±7.3] <sup>ab</sup>         | 58.2 [±7.7] <sup>abc</sup>  | 50.5 [±16.9] <sup>ab</sup>                                                               | 51.3 [±16.1] <sup>abc</sup>  | 27.0 [±1.4] <sup>e</sup>    | 94.8 [±1.8] <sup>cde</sup>  | 24.2 [±12.0] <sup>ab</sup> | 5.8 [±2.5] <sup>abcd</sup> |
| SC124      | 92.3 [±67.2] <sup>abcde</sup>                                          | 51.2 [±12.9] <sup>abcdef</sup>    | 32.0 [±21.3] <sup>abc</sup> |                                                                                          |                              |                             |                             |                            |                            |
| TAI 8      | 75.7 [±27.5] <sup>abcd</sup>                                           | 58.6 [±14.4] <sup>bcdefghi</sup>  | 63.5 [±17.4] <sup>abc</sup> |                                                                                          |                              |                             |                             |                            |                            |
| TAI 3      | 55.3 [±11.2] <sup>ab</sup>                                             | 21.4 [±4.6] <sup>a</sup>          | 66.2 [±30.7] <sup>abc</sup> | 43.0 [±7.1] <sup>a</sup>                                                                 | 25.4 [±4.2] <sup>a</sup>     | 16.5 [±1.7] <sup>ab</sup>   | 84.6 [±4.0] <sup>abcd</sup> | 59.3 [±11.0] <sup>c</sup>  | 9.0 [±2.4] <sup>d</sup>    |
| H226       | 117.7 [±28.9] <sup>abcdef</sup>                                        | 100.7 [±21.5] <sup>j</sup>        | 40.1 [±15.7] <sup>abc</sup> |                                                                                          |                              |                             |                             |                            |                            |
| KM140      | 102.0 [±17.6] <sup>abcdef</sup>                                        | 57.5 [±9.0] <sup>bcdefghi</sup>   | 72.8 [±9.4] <sup>bc</sup>   |                                                                                          |                              |                             |                             |                            |                            |
| KM397      | 120.0 [±20.0] <sup>bcdef</sup>                                         | 46.1 [±3.2] <sup>abcd</sup>       | 19.1 [±4.0] <sup>a</sup>    |                                                                                          |                              |                             |                             |                            |                            |
| 11SA12     | 118.7 [±11.8] <sup>bcdef</sup>                                         | 67.7 [±9.8] <sup>bcdefghij</sup>  | 44.2 [±20.0] <sup>abc</sup> |                                                                                          |                              |                             |                             |                            |                            |

**Supplementary Table S5. Preliminary quantification of vitamin B<sub>1</sub> in 41 cassava accessions using a yeast bioassay.**

Leaf (A) and storage root (B) vitamin B<sub>1</sub> contents in greenhouse grown cassava accessions. Accessions with a vitamin B<sub>1</sub> content below the 25<sup>th</sup> percentile of the distribution were considered as accessions with low vitamin B<sub>1</sub> content, whereas those with a vitamin content above the 75<sup>th</sup> percentile were considered as accessions with high vitamin B<sub>1</sub> content. Low, intermediate and high vitamin B<sub>1</sub> accessions selected for a repeated independent quantification are in blue-green, blue and vermilion, respectively. Average  $\pm$  S.D. of 3 biological replicates except TMS 30572 (n=2) for leaves and TMS 30572 (n=2), MEX 95 (n=2), PSE XXX-1 (n=2) for storage roots. T200 did not produce any storage roots. Tukey's multiple comparison test ( $p < 0.05$ ). Maximum fold difference (highest/lowest vitamin B<sub>1</sub> content) and S.D. calculated with Taylor series linearization method.

| <b>A LEAVES</b>         |                                                      |                                                                                                             | <b>B STORAGE ROOTS</b>                |                                                                                      |                                                                                                             |
|-------------------------|------------------------------------------------------|-------------------------------------------------------------------------------------------------------------|---------------------------------------|--------------------------------------------------------------------------------------|-------------------------------------------------------------------------------------------------------------|
| <b>Accession</b>        | <b>Vitamin B<sub>1</sub> (ng mg FW<sup>-1</sup>)</b> |                                                                                                             | <b>Accession</b>                      | <b>Vitamin B<sub>1</sub> (ng mg FW<sup>-1</sup>)</b>                                 |                                                                                                             |
| BRA 132                 | 1.78 [ $\pm 0.63$ ] <sup>a</sup>                     | Below the 25 <sup>th</sup> percentile of vitamin B <sub>1</sub> content distribution                        | CM 2177-2                             | 1.01 [ $\pm 0.12$ ] <sup>a</sup>                                                     | Below the 25 <sup>th</sup> percentile of vitamin B <sub>1</sub> content distribution                        |
| COL 22                  | 2.24 [ $\pm 0.39$ ] <sup>a</sup>                     |                                                                                                             | KBH 2006/18                           | 1.24 [ $\pm 0.19$ ] <sup>ab</sup>                                                    |                                                                                                             |
| BRA 222                 | 2.46 [ $\pm 0.80$ ] <sup>a</sup>                     |                                                                                                             | TST XXX-18                            | 1.41 [ $\pm 0.63$ ] <sup>abc</sup>                                                   |                                                                                                             |
| TMS 30572               | 2.50 [ $\pm 0.99$ ] <sup>ab</sup>                    |                                                                                                             | CM 6438-14                            | 1.49 [ $\pm 0.47$ ] <sup>abc</sup>                                                   |                                                                                                             |
| TST XXX-18              | 2.64 [ $\pm 0.65$ ] <sup>ab</sup>                    |                                                                                                             | SC124                                 | 1.56 [ $\pm 0.29$ ] <sup>abc</sup>                                                   |                                                                                                             |
| TAI 3                   | 2.66 [ $\pm 0.68$ ] <sup>ab</sup>                    |                                                                                                             | BRA 325                               | 1.73 [ $\pm 0.29$ ] <sup>abcd</sup>                                                  |                                                                                                             |
| TAI 8                   | 2.68 [ $\pm 0.57$ ] <sup>ab</sup>                    |                                                                                                             | KBH 2006/26                           | 1.75 [ $\pm 1.11$ ] <sup>abcd</sup>                                                  |                                                                                                             |
| KU50                    | 2.71 [ $\pm 0.67$ ] <sup>ab</sup>                    |                                                                                                             | KU 50                                 | 1.76 [ $\pm 0.48$ ] <sup>abcd</sup>                                                  |                                                                                                             |
| BRA 685                 | 3.29 [ $\pm 1.02$ ] <sup>ab</sup>                    | Between the 25 <sup>th</sup> and 75 <sup>th</sup> percentile of vitamin B <sub>1</sub> content distribution | BRA 222                               | 1.79 [ $\pm 0.29$ ] <sup>abcd</sup>                                                  | Between the 25 <sup>th</sup> and 75 <sup>th</sup> percentile of vitamin B <sub>1</sub> content distribution |
| MEX 95                  | 3.31 [ $\pm 0.93$ ] <sup>ab</sup>                    |                                                                                                             | MEX 95                                | 1.81 [ $\pm 0.42$ ] <sup>abcd</sup>                                                  |                                                                                                             |
| VEN 25                  | 3.48 [ $\pm 1.00$ ] <sup>ab</sup>                    |                                                                                                             | SG 107-35                             | 2.01 [ $\pm 0.68$ ] <sup>abcd</sup>                                                  |                                                                                                             |
| SC124                   | 3.49 [ $\pm 1.37$ ] <sup>ab</sup>                    |                                                                                                             | TAI 8                                 | 2.03 [ $\pm 0.59$ ] <sup>abcd</sup>                                                  |                                                                                                             |
| KM397                   | 3.55 [ $\pm 0.96$ ] <sup>ab</sup>                    |                                                                                                             | H226                                  | 2.04 [ $\pm 0.27$ ] <sup>abcd</sup>                                                  |                                                                                                             |
| KM140                   | 3.64 [ $\pm 0.59$ ] <sup>ab</sup>                    |                                                                                                             | BRA 685                               | 2.10 [ $\pm 0.65$ ] <sup>abcd</sup>                                                  |                                                                                                             |
| KBH 2006/18             | 3.64 [ $\pm 1.14$ ] <sup>ab</sup>                    |                                                                                                             | KM397                                 | 2.10 [ $\pm 0.27$ ] <sup>abcd</sup>                                                  |                                                                                                             |
| CM 6438-14              | 3.69 [ $\pm 1.07$ ] <sup>ab</sup>                    |                                                                                                             | TMS 30572                             | 2.11 [ $\pm 0.47$ ] <sup>abcd</sup>                                                  |                                                                                                             |
| BRA 325                 | 3.70 [ $\pm 0.44$ ] <sup>ab</sup>                    |                                                                                                             | TAI 3                                 | 2.16 [ $\pm 0.35$ ] <sup>abcd</sup>                                                  |                                                                                                             |
| TMS 30001               | 3.82 [ $\pm 0.34$ ] <sup>ab</sup>                    |                                                                                                             | BRA 132                               | 2.17 [ $\pm 1.21$ ] <sup>abcd</sup>                                                  |                                                                                                             |
| PSE XXX-1               | 3.84 [ $\pm 2.38$ ] <sup>ab</sup>                    |                                                                                                             | TMe-3                                 | 2.18 [ $\pm 0.22$ ] <sup>abcd</sup>                                                  |                                                                                                             |
| KBH 2006/26             | 3.85 [ $\pm 1.52$ ] <sup>ab</sup>                    |                                                                                                             | KM140                                 | 2.23 [ $\pm 0.55$ ] <sup>abcd</sup>                                                  |                                                                                                             |
| H226                    | 3.99 [ $\pm 0.26$ ] <sup>ab</sup>                    |                                                                                                             | Kibandameno                           | 2.26 [ $\pm 0.32$ ] <sup>abcd</sup>                                                  |                                                                                                             |
| BRA 293                 | 4.05 [ $\pm 2.10$ ] <sup>ab</sup>                    |                                                                                                             | Ebwanateraka                          | 2.29 [ $\pm 0.17$ ] <sup>abcd</sup>                                                  |                                                                                                             |
| T 200                   | 4.14 [ $\pm 0.29$ ] <sup>ab</sup>                    |                                                                                                             | VEN 25                                | 2.39 [ $\pm 0.49$ ] <sup>abcd</sup>                                                  |                                                                                                             |
| SC8                     | 4.26 [ $\pm 1.70$ ] <sup>ab</sup>                    |                                                                                                             | cv. 60444                             | 2.41 [ $\pm 0.69$ ] <sup>abcd</sup>                                                  |                                                                                                             |
| SG 107-35               | 4.43 [ $\pm 1.11$ ] <sup>ab</sup>                    |                                                                                                             | TMS 30001                             | 2.46 [ $\pm 0.31$ ] <sup>abcde</sup>                                                 |                                                                                                             |
| TMS 30555               | 4.44 [ $\pm 0.74$ ] <sup>ab</sup>                    |                                                                                                             | COL 22                                | 2.54 [ $\pm 0.48$ ] <sup>abcde</sup>                                                 |                                                                                                             |
| CM 2177-2               | 4.50 [ $\pm 1.34$ ] <sup>ab</sup>                    |                                                                                                             | 11SA12                                | 2.59 [ $\pm 0.66$ ] <sup>abcde</sup>                                                 |                                                                                                             |
| Kibandameno             | 4.51 [ $\pm 1.14$ ] <sup>ab</sup>                    |                                                                                                             | PSE-XXX-1                             | 2.74 [ $\pm 0.73$ ] <sup>abcdef</sup>                                                |                                                                                                             |
| Ebwanateraka            | 4.57 [ $\pm 1.10$ ] <sup>ab</sup>                    | Kibaha                                                                                                      | 2.74 [ $\pm 0.86$ ] <sup>abcdef</sup> |                                                                                      |                                                                                                             |
| PER 183                 | 4.84 [ $\pm 0.48$ ] <sup>ab</sup>                    | CM 523-7                                                                                                    | 2.81 [ $\pm 0.20$ ] <sup>abcdef</sup> | Above the 75 <sup>th</sup> percentile of vitamin B <sub>1</sub> content distribution |                                                                                                             |
| COL 1505                | 4.95 [ $\pm 1.60$ ] <sup>ab</sup>                    | BRA 293                                                                                                     | 2.82 [ $\pm 0.47$ ] <sup>abcdef</sup> |                                                                                      |                                                                                                             |
| TMe-3                   | 5.08 [ $\pm 2.05$ ] <sup>ab</sup>                    | SC8                                                                                                         | 2.86 [ $\pm 0.39$ ] <sup>abcdef</sup> |                                                                                      |                                                                                                             |
| TMe-7                   | 5.17 [ $\pm 1.54$ ] <sup>ab</sup>                    | GUA 79                                                                                                      | 2.87 [ $\pm 0.39$ ] <sup>abcdef</sup> |                                                                                      |                                                                                                             |
| TMe-14                  | 5.18 [ $\pm 0.86$ ] <sup>ab</sup>                    | ARG 13                                                                                                      | 2.94 [ $\pm 0.30$ ] <sup>abcdef</sup> |                                                                                      |                                                                                                             |
| 11SA12                  | 5.23 [ $\pm 3.35$ ] <sup>ab</sup>                    | TMe-7                                                                                                       | 3.08 [ $\pm 0.17$ ] <sup>bcdef</sup>  |                                                                                      |                                                                                                             |
| GUA 79                  | 5.25 [ $\pm 3.28$ ] <sup>ab</sup>                    | ECU 72                                                                                                      | 3.17 [ $\pm 1.01$ ] <sup>bcdef</sup>  |                                                                                      |                                                                                                             |
| cv. 60444               | 5.30 [ $\pm 1.20$ ] <sup>ab</sup>                    | PER 183                                                                                                     | 3.30 [ $\pm 0.57$ ] <sup>cdef</sup>   |                                                                                      |                                                                                                             |
| Kibaha                  | 5.45 [ $\pm 2.46$ ] <sup>ab</sup>                    | TMS 30555                                                                                                   | 3.72 [ $\pm 1.40$ ] <sup>def</sup>    |                                                                                      |                                                                                                             |
| CM 523-7                | 5.98 [ $\pm 1.98$ ] <sup>ab</sup>                    | TMe-14                                                                                                      | 4.45 [ $\pm 0.42$ ] <sup>ef</sup>     |                                                                                      |                                                                                                             |
| ECU 72                  | 6.14 [ $\pm 3.87$ ] <sup>ab</sup>                    | COL 1505                                                                                                    | 4.72 [ $\pm 0.69$ ] <sup>f</sup>      |                                                                                      |                                                                                                             |
| ARG 13                  | 7.52 [ $\pm 0.27$ ] <sup>b</sup>                     |                                                                                                             |                                       |                                                                                      |                                                                                                             |
| Maximum fold difference |                                                      | <b>4.22</b> [ $\pm 0.37$ ]                                                                                  | Maximum fold difference               |                                                                                      | <b>4.68</b> [ $\pm 0.69$ ]                                                                                  |

**Supplementary Table S6. Repeated independent quantification of vitamin B<sub>1</sub> in 18 selected cassava accessions using a yeast bioassay.**

Leaf (A, C) and storage root (B, D) vitamin B<sub>1</sub> contents in greenhouse-grown cassava accessions. Vitamin B<sub>1</sub> contents were expressed according to the fresh weight (FW) (A, B) and dry weight (DW) (C, D). Accessions with a vitamin B<sub>1</sub> content below the 25<sup>th</sup> percentile of the distribution were considered as accessions with low vitamin B<sub>1</sub> content, whereas those with a vitamin content above the 75<sup>th</sup> percentile were considered as accessions with high vitamin B<sub>1</sub> content. Low, intermediate and high vitamin B<sub>1</sub> accessions selected for HPLC analysis are in blue-green, blue and vermilion, respectively. Average  $\pm$  S.D. of 4 biological replicates except CM2177-2 (n=1), TST-XXX-18 (n=3) for leaves and CM2177-2 (n=1), TST XXX-18 (n=1), MEX 95 (n=3) for storage roots. Tukey's multiple comparison test ( $p < 0.05$ ). Maximum fold difference (highest/lowest vitamin B<sub>1</sub> content) and S.D. calculated with Taylor series linearization method.

| <b>A LEAVES</b>         |                                                  |                                                          |
|-------------------------|--------------------------------------------------|----------------------------------------------------------|
| Accession               | Vitamin B <sub>1</sub> (ng mg FW <sup>-1</sup> ) |                                                          |
| TAI 3                   | 1.66 [ $\pm 0.29$ ] <sup>a</sup>                 | Below the 25 <sup>th</sup> percentile                    |
| BRA 132                 | 1.90 [ $\pm 0.17$ ] <sup>a</sup>                 |                                                          |
| PSE XXX-1               | 2.34 [ $\pm 0.48$ ] <sup>ab</sup>                |                                                          |
| KBH 2006/18             | 2.73 [ $\pm 0.18$ ] <sup>abc</sup>               | Between 25 <sup>th</sup> and 75 <sup>th</sup> percentile |
| cv. 60444               | 2.87 [ $\pm 0.17$ ] <sup>abc</sup>               |                                                          |
| MEX 95                  | 2.87 [ $\pm 0.81$ ] <sup>abc</sup>               |                                                          |
| KU 50                   | 2.90 [ $\pm 1.22$ ] <sup>abc</sup>               |                                                          |
| CM 2177-2               | 3.05                                             |                                                          |
| TST XXX-18              | 3.09 [ $\pm 0.23$ ] <sup>abc</sup>               |                                                          |
| TMS 30572               | 3.12 [ $\pm 1.25$ ] <sup>abc</sup>               |                                                          |
| COL 22                  | 3.35 [ $\pm 0.76$ ] <sup>abc</sup>               |                                                          |
| TMe-3                   | 3.37 [ $\pm 0.75$ ] <sup>abc</sup>               |                                                          |
| TMe-7                   | 3.57 [ $\pm 0.47$ ] <sup>abc</sup>               |                                                          |
| SC8                     | 4.06 [ $\pm 1.28$ ] <sup>bcd</sup>               |                                                          |
| ARG 13                  | 4.40 [ $\pm 0.89$ ] <sup>cde</sup>               | Above the 75 <sup>th</sup> percentile                    |
| COL 1505                | 4.43 [ $\pm 0.91$ ] <sup>cde</sup>               |                                                          |
| GUA 79                  | 5.68 [ $\pm 1.07$ ] <sup>de</sup>                |                                                          |
| Kibaha                  | 6.35 [ $\pm 0.78$ ] <sup>e</sup>                 |                                                          |
| Maximum fold difference |                                                  | 3.82 [ $\pm 0.49$ ]                                      |

| <b>B STORAGE ROOTS</b>  |                                                  |                                                          |
|-------------------------|--------------------------------------------------|----------------------------------------------------------|
| Accession               | Vitamin B <sub>1</sub> (ng mg FW <sup>-1</sup> ) |                                                          |
| KBH 2006/18             | 0.69 [ $\pm 0.07$ ] <sup>a</sup>                 | Below the 25 <sup>th</sup> percentile                    |
| Kibaha                  | 0.73 [ $\pm 0.16$ ] <sup>a</sup>                 |                                                          |
| GUA 79                  | 0.89 [ $\pm 0.21$ ] <sup>ab</sup>                | Between 25 <sup>th</sup> and 75 <sup>th</sup> percentile |
| cv. 60444               | 0.90 [ $\pm 0.18$ ] <sup>ab</sup>                |                                                          |
| TST XXX-18              | 0.92                                             |                                                          |
| TMe-3                   | 0.95 [ $\pm 0.10$ ] <sup>abc</sup>               |                                                          |
| SC8                     | 0.97 [ $\pm 0.26$ ] <sup>abc</sup>               |                                                          |
| COL 22                  | 0.97 [ $\pm 0.18$ ] <sup>abc</sup>               |                                                          |
| BRA 132                 | 0.99 [ $\pm 0.14$ ] <sup>abc</sup>               |                                                          |
| CM 2177-2               | 1.00                                             |                                                          |
| PSE XXX-1               | 1.01 [ $\pm 0.23$ ] <sup>abc</sup>               |                                                          |
| KU 50                   | 1.01 [ $\pm 0.14$ ] <sup>abc</sup>               |                                                          |
| TMS 30572               | 1.09 [ $\pm 0.10$ ] <sup>abc</sup>               |                                                          |
| TMe-7                   | 1.17 [ $\pm 0.17$ ] <sup>abc</sup>               |                                                          |
| MEX 95                  | 1.17 [ $\pm 0.31$ ] <sup>abc</sup>               |                                                          |
| TAI 3                   | 1.18 [ $\pm 0.12$ ] <sup>abc</sup>               | Above the 75 <sup>th</sup> percentile                    |
| ARG 13                  | 1.37 [ $\pm 0.14$ ] <sup>bc</sup>                |                                                          |
| COL 1505                | 1.41 [ $\pm 0.36$ ] <sup>c</sup>                 |                                                          |
| Maximum fold difference |                                                  | 2.03 [ $\pm 0.52$ ]                                      |

| <b>C LEAVES</b>         |                                                  |                                                          |
|-------------------------|--------------------------------------------------|----------------------------------------------------------|
| Accession               | Vitamin B <sub>1</sub> (ng mg DW <sup>-1</sup> ) |                                                          |
| TAI 3                   | 3.71 [ $\pm 0.56$ ] <sup>a</sup>                 | Below the 25 <sup>th</sup> percentile                    |
| BRA 132                 | 5.14 [ $\pm 0.54$ ] <sup>ab</sup>                |                                                          |
| PSE XXX-1               | 5.81 [ $\pm 1.16$ ] <sup>abc</sup>               |                                                          |
| KBH 2006/18             | 6.75 [ $\pm 0.90$ ] <sup>abc</sup>               | Between 25 <sup>th</sup> and 75 <sup>th</sup> percentile |
| KU 50                   | 7.59 [ $\pm 3.50$ ] <sup>abcd</sup>              |                                                          |
| TST XXX-18              | 7.62 [ $\pm 1.37$ ] <sup>abcd</sup>              |                                                          |
| MEX 95                  | 7.79 [ $\pm 2.58$ ] <sup>abcd</sup>              |                                                          |
| TMS 30572               | 7.93 [ $\pm 2.93$ ] <sup>abcd</sup>              |                                                          |
| cv. 60444               | 8.24 [ $\pm 0.61$ ] <sup>abcd</sup>              |                                                          |
| TMe-3                   | 8.32 [ $\pm 2.28$ ] <sup>abcd</sup>              |                                                          |
| CM 2177-2               | 8.66                                             |                                                          |
| COL 22                  | 8.70 [ $\pm 2.01$ ] <sup>abcd</sup>              |                                                          |
| TMe-7                   | 9.13 [ $\pm 1.61$ ] <sup>abcd</sup>              |                                                          |
| SC8                     | 9.91 [ $\pm 3.07$ ] <sup>bcd</sup>               |                                                          |
| ARG 13                  | 11.38 [ $\pm 2.00$ ] <sup>cde</sup>              | Above the 75 <sup>th</sup> percentile                    |
| COL 1505                | 13.05 [ $\pm 3.25$ ] <sup>de</sup>               |                                                          |
| Kibaha                  | 17.26 [ $\pm 2.48$ ] <sup>ef</sup>               |                                                          |
| GUA 79                  | 19.18 [ $\pm 3.23$ ] <sup>f</sup>                |                                                          |
| Maximum fold difference |                                                  | 5.17 [ $\pm 0.89$ ]                                      |

| <b>D STORAGE ROOTS</b>  |                                                  |                                                          |
|-------------------------|--------------------------------------------------|----------------------------------------------------------|
| Accession               | Vitamin B <sub>1</sub> (ng mg DW <sup>-1</sup> ) |                                                          |
| TST XXX-18              | 1.03                                             | Below the 25 <sup>th</sup> percentile                    |
| Kibaha                  | 2.00 [ $\pm 0.48$ ] <sup>a</sup>                 |                                                          |
| GUA 79                  | 2.10 [ $\pm 0.60$ ] <sup>a</sup>                 |                                                          |
| MEX 95                  | 2.24 [ $\pm 0.38$ ] <sup>a</sup>                 | Between 25 <sup>th</sup> and 75 <sup>th</sup> percentile |
| KBH 2006/18             | 2.49 [ $\pm 0.27$ ] <sup>a</sup>                 |                                                          |
| TMe-3                   | 2.55 [ $\pm 0.22$ ] <sup>a</sup>                 |                                                          |
| SC8                     | 2.79 [ $\pm 1.04$ ] <sup>ab</sup>                |                                                          |
| COL 22                  | 2.82 [ $\pm 0.59$ ] <sup>ab</sup>                |                                                          |
| BRA 132                 | 2.90 [ $\pm 0.76$ ] <sup>ab</sup>                |                                                          |
| KU 50                   | 2.95 [ $\pm 0.48$ ] <sup>ab</sup>                |                                                          |
| PSE XXX-1               | 3.02 [ $\pm 1.53$ ] <sup>ab</sup>                |                                                          |
| cv. 60444               | 3.03 [ $\pm 0.62$ ] <sup>ab</sup>                |                                                          |
| TMS 30572               | 3.05 [ $\pm 0.54$ ] <sup>ab</sup>                |                                                          |
| TMe-7                   | 3.10 [ $\pm 0.38$ ] <sup>ab</sup>                |                                                          |
| CM 2177-2               | 3.28                                             |                                                          |
| TAI 3                   | 3.39 [ $\pm 0.33$ ] <sup>ab</sup>                | Above the 75 <sup>th</sup> percentile                    |
| COL 1505                | 3.73 [ $\pm 0.88$ ] <sup>ab</sup>                |                                                          |
| ARG 13                  | 4.31 [ $\pm 0.51$ ] <sup>b</sup>                 |                                                          |
| Maximum fold difference |                                                  | 2.15 [ $\pm 0.30$ ]                                      |

**Supplementary Table S7. Thermal processing of cassava commercial storage roots.**

Cassava commercial storage roots processed for consumption. The gain of weight during processing is expressed as a percentage of the raw material weight. Moisture content in root pieces is expressed as a percentage of the fresh weight and corresponds to the contribution of water to the fresh weight. Vitamin B<sub>1</sub> content was quantified using a yeast bioassay.

|                 | RAW                                 |                                                          | BOILING                              |                                     |                                                          | SOAKING + BOILING                    |                                     |                                                          |
|-----------------|-------------------------------------|----------------------------------------------------------|--------------------------------------|-------------------------------------|----------------------------------------------------------|--------------------------------------|-------------------------------------|----------------------------------------------------------|
|                 | Moisture content in root pieces (%) | Vitamin B <sub>1</sub> content (ng mg FW <sup>-1</sup> ) | Gain of weight during processing (%) | Moisture content in root pieces (%) | Vitamin B <sub>1</sub> content (ng mg FW <sup>-1</sup> ) | Gain of weight during processing (%) | Moisture content in root pieces (%) | Vitamin B <sub>1</sub> content (ng mg FW <sup>-1</sup> ) |
| Root 1          | 59,4                                | 1,6                                                      | +5,1                                 | 60,5                                | 1,5                                                      | +4.2                                 | 63,9                                | 0,5                                                      |
| Root 2          | 61,3                                | 1,8                                                      | +1,8                                 | 60,9                                | 1,5                                                      | +2.3                                 | 60,4                                | 1,1                                                      |
| Root 3          | 60,6                                | 1,6                                                      | +13,9                                | 64,4                                | 0,8                                                      | +3.3                                 | 68,9                                | 0,7                                                      |
| Root 4          | 63,7                                | 1,8                                                      | +14,8                                | 60,2                                | 1,2                                                      | +1.4                                 | 62,1                                | 1,4                                                      |
| Average [±S.D.] | 61.2 [±1.8]                         | 1.7 [±0.1]                                               | +8.9 [±6.4]                          | 61.5 [±2.0]                         | 1.3 [±0.3]                                               | +2.8 [±1.2]                          | 63.9 [±3.7]                         | 0.9 [±0.4]                                               |
